# Supplementary material for: Raman Spectroscopy as a Novel Method for the Characterization of Polydioxanone Medical Stents Biodegradation
Source: MDPI journal article supplement (doi:10.3390/ma14185462), 2021-09-21

**č. 19-0859-61**

|                 |                                                               |               |           |
|-----------------|---------------------------------------------------------------|---------------|-----------|
| Název:          | <b>Termická analýza biodegradabilního polymeru</b>            |               |           |
| Přijetí vzorku: | 05. 09.2019                                                   |               |           |
| Vypracoval:     | Z. Křenková                                                   | Zkontroloval: | T. Čermák |
| Zadavatel:      | ELLA-CS s.r.o., Milady Horákové 504/45, 500 06 Hradec Králové |               |           |

**Výsledky:**

Byla provedena termická analýza biodegradabilního polymeru:  
D6-02-16, Lot S19001245-01, CETA č. 288/19 (nedegradovaný)

Výsledky diferenciální skenovací kalorimetrie (DSC) jsou uvedeny v tabulce č. 1 (teploty tání a krystalizace, entalpie tání a studené krystalizace, skelný přechod) a v tabulce č. 2 (krystalinita).

Měření DSC jsou zobrazena na obrázcích č. 1 – 3.

Měření termogravimetrické analýzy (TGA) jsou zobrazena na obrázcích č. 4 a 5.

**Poznámky:**

Analýza byla provedena v souladu s normami:

- ČSN EN ISO 11357-1 Plasty – Diferenciální snímací kalorimetrie (DSC) – Část 1: Základní principy
- ČSN EN ISO 11357-2 Plasty – Diferenciální snímací kalorimetrie (DSC) – Část 2: Stanovení teploty a výšky skoku skelného přechodu
- ČSN EN ISO 11357-3 Plasty – Diferenciální snímací kalorimetrie (DSC) – Část 3: Stanovení teploty a entalpie tání a krystalizace
- ČSN EN ISO 11358-1 Plasty – Termogravimetrie (TG) polymerů – Část 1: Obecné principy

**Ing. Michal Bartoš**

Vedoucí úseku ANALYTIKA

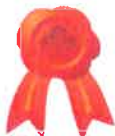

Signature valid  
Digitálně podepsáno  
Jméno: Ing. Michal Bartoš  
Datum: 16.10.2019 16:47:33

**Analyzovaný vzorek:**

D6-02-16, Lot S19001245-01, CETA č. 288/19 (nedegradovaný)

Materiál polydioxanon (PDO).

(Skladování v exsikátoru při laboratorní teplotě)

**Diferenční skenovací kalorimetrie****Přístrojové vybavení:**DSC823<sup>e</sup> Mettler Toledo

- Měřicí teplotní rozsah: 203 – 973 K (-70 to 700 °C)
- Rozlišení: přibližně 0.07 µW
- Měřicí kelímek: hliníkový kelímek (100µl), zalisovaný víčkem s otvorem vytvořeným speciálním bodlem
- Referenční kelímek: prázdný hliníkový kelímek (100µl), zalisovaný víčkem s otvorem vytvořeným speciálním bodlem

S ohledem na požadavky hodnocení krystalinity byly vzorky navažovány na mikrováhách (součást zařízení TGA/DSC1 Mettler Toledo).

**Metoda:**

| Krok |                           | Teplotní rozsah [°C] | Čas isotermy [min]/<br>teplotní gradient [°C/min] |
|------|---------------------------|----------------------|---------------------------------------------------|
| 1.   | isotermický krok          | 25                   | 5 min                                             |
| 2.   | dynamický krok – 1.ohřev  | 25 – 150             | 5 °C/min                                          |
| 3.   | isotermický krok          | 150                  | 5 min                                             |
| 4.   | dynamický krok – chlazení | 150 - -30            | 5 °C/min                                          |
| 5.   | isotermický krok          | -30                  | 5 min                                             |
| 6.   | dynamický krok – 2.ohřev  | -30 - 150            | 5 °C/min                                          |

**Termogravimetrická analýza****Přístrojové vybavení:**

TGA/DSC1 Mettler Toledo

- Teplotní rozsah: 298 – 1373 K (25 – 1100 °C)
- Citlivost: 0.5 mW
- Teplotní rozlišení: 0.005 K
- Měřicí kelímek: hliníkový kelímek (100µl), zalisovaný víčkem s otvorem vytvořeným speciálním bodlem

**Metoda:**

Teplotní rozsah [°C] 25 – 400 °C (1.měření) a 25 – 300 °C (2. měření)

teplotní gradient [°C/min] 5 °C/min

Průtok inertního plynu (dusík) byl nastaven na cca 80 ml/min.

Hodnocení a závěr:

Diferenční skenovací kalorimetrie

Tabulka č. 1: Termická charakterizace vzorku D6-02-16, Lot S19001245-01, CETA č. 288/19

| Stanovení č. | Teplota tání                |             |             | Entalpie tání | Teplota krystalizace | Sklenný přechod | Entalpie studené krystalizace | Entalpie studené krystalizace (premelting) | Entalpie tání |                       |                       |                       |
|--------------|-----------------------------|-------------|-------------|---------------|----------------------|-----------------|-------------------------------|--------------------------------------------|---------------|-----------------------|-----------------------|-----------------------|
|              | T <sub>m</sub> (onset) [°C] | Peak 1 [°C] | Peak 2 [°C] |               |                      |                 |                               |                                            |               | ΔH <sub>f</sub> [J/g] | ΔH <sub>c</sub> [J/g] | ΔH <sub>f</sub> [J/g] |
|              |                             |             |             |               |                      |                 |                               |                                            |               |                       |                       |                       |
|              |                             |             |             |               |                      |                 |                               |                                            |               |                       |                       |                       |
| 1. ohřev     |                             |             | 1. ohřev    |               |                      | 2. ohřev        |                               | 2. ohřev                                   |               |                       |                       |                       |
| 1            | 94,12                       | 96,52       | 109,08      | 63,37         | chlazení             |                 | 24,02                         | 3,64                                       | 47,98         |                       |                       |                       |
| 2            | 93,77                       | 97,46       | 105,19      | 69,02         | 67,69                | 49,20           | 25,07                         | 4,08                                       | 49,90         |                       |                       |                       |
| 3            | 93,99                       | 98,18       | 108,42      | 69,11         | 67,49                | 51,29           | 26,31                         | 4,26                                       | 51,11         |                       |                       |                       |
| Průměr       | 94,0                        | 97,4        | 107,6       | 67,2          | 67,03                | 50,79           | 25,1                          | 4,0                                        | 49,7          |                       |                       |                       |
| SD           | 0,2                         | 0,8         | 2,1         | 3,3           | 0,3                  | 1,1             | 1,1                           | 0,3                                        | 1,6           |                       |                       |                       |

Onset teplota ..... extrapolovaná počáteční teplota (průsečík extrapolované základní čáry tepelného toku s tečnou v inflexním bodu píku)

Výpočty:

$$X_c = \frac{\Delta H_f - \Delta H_c}{\Delta H_f 100\%} \times 100$$

X<sub>c</sub>.....Krystalinita; procentuální podíl krystalické fáze polymeru [%]  
ΔH<sub>f</sub>.....Entalpie tání; teplo pohlcené v průběhu tání vzorku [J/g]  
ΔH<sub>c</sub>.....Entalpie studené krystalizace; teplo uvolněné v průběhu studené krystalizace vzorku [J/g]  
ΔH<sub>f</sub> 100%.....Teoretická hodnota entalpie tání 100% krystalického polymeru PDO [J/g]; 141,18 J/g (zdroj: Thermal properties and non-isothermal crystallization behavior of biodegradable poly(p-dioxanone)/poly(vinyl alcohol) blends; DOI: 10.1002/pi.1904)

Krystalinita polymeru (X<sub>c</sub>) vyhodnocená během 1. ohřevu charakterizuje polymer ("as received") s jeho teplotní a mechanickou historií (vliv výrobního postupu, skladování atd.). Krystalinita vyhodnocená během 2. ohřevu charakterizuje polymer po vymazání jeho teplotní i mechanické historie a slouží především ke srovnávání polymerních materiálů vzájemně.

Tabulka č. 2: Krystalinita vzorku D6-02-16, Lot S19001245-01, CETA č. 288/19 vyhodnocená během 1. a 2. ohřevu

| Stanovení č.  | Krystalinita, $X_c$<br>[%] |             |
|---------------|----------------------------|-------------|
|               | 1. ohřev                   | 2. ohřev    |
| 1             | 44,9                       | 14,4        |
| 2             | 48,9                       | 14,7        |
| 3             | 49,0                       | 14,5        |
| <b>Průměr</b> | <b>47,6</b>                | <b>14,5</b> |
| SD            | 2,3                        | 0,2         |

Obrázek č. 1: DSC vzorku D6-02-16, Lot S19001245-01, CETA č. 288/19 (1. měření)

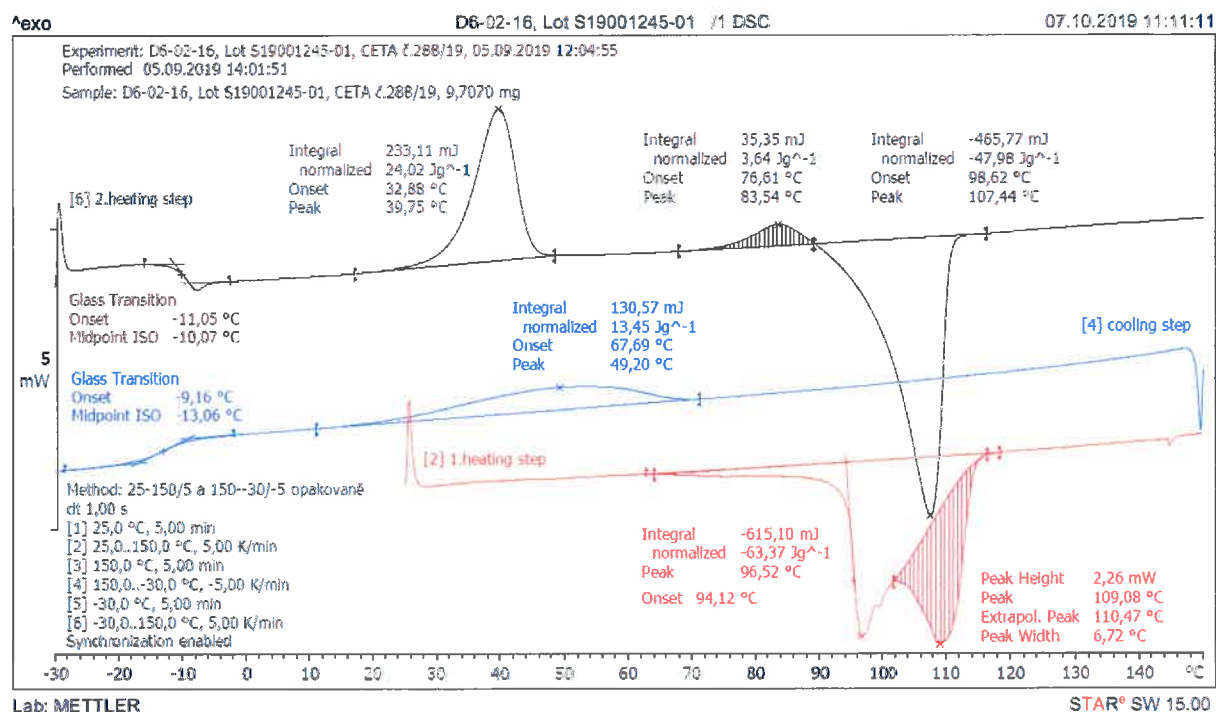

Obrázek č. 2: DSC vzorku D6-02-16, Lot S19001245-01, CETA č. 288/19 (2. měření)

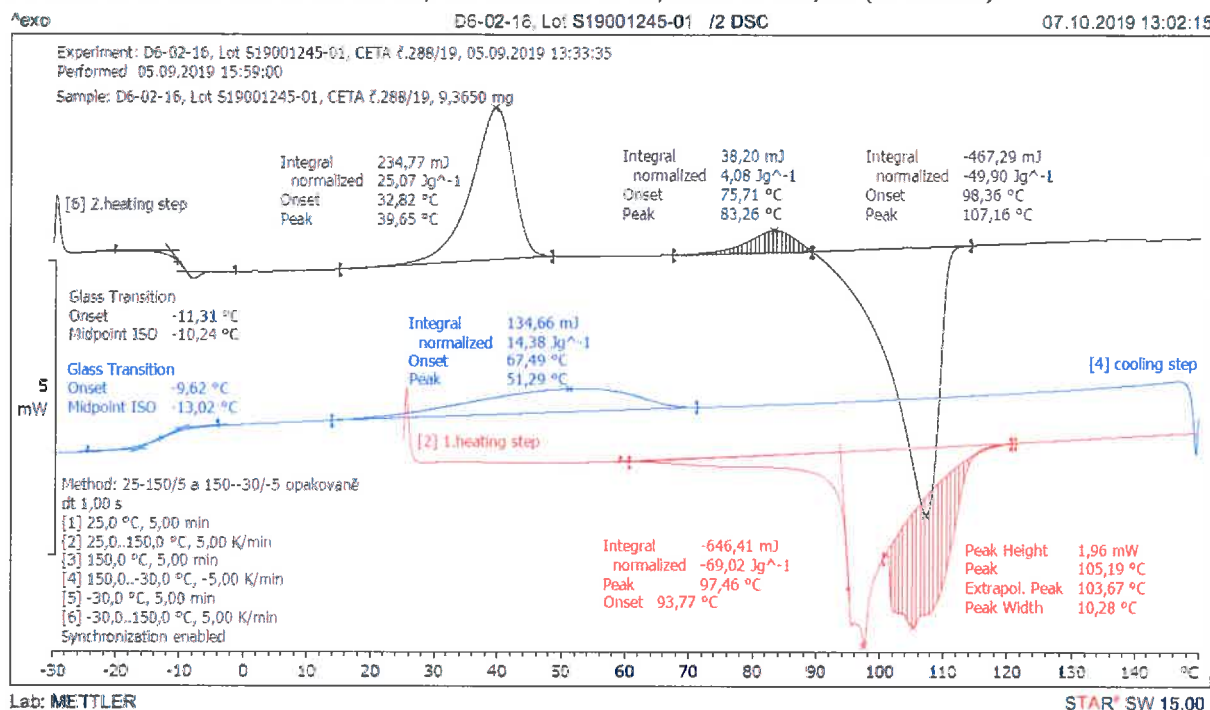

Obrázek č. 3: DSC vzorku D6-02-16, Lot S19001245-01, CETA č. 288/19 (3. měření)

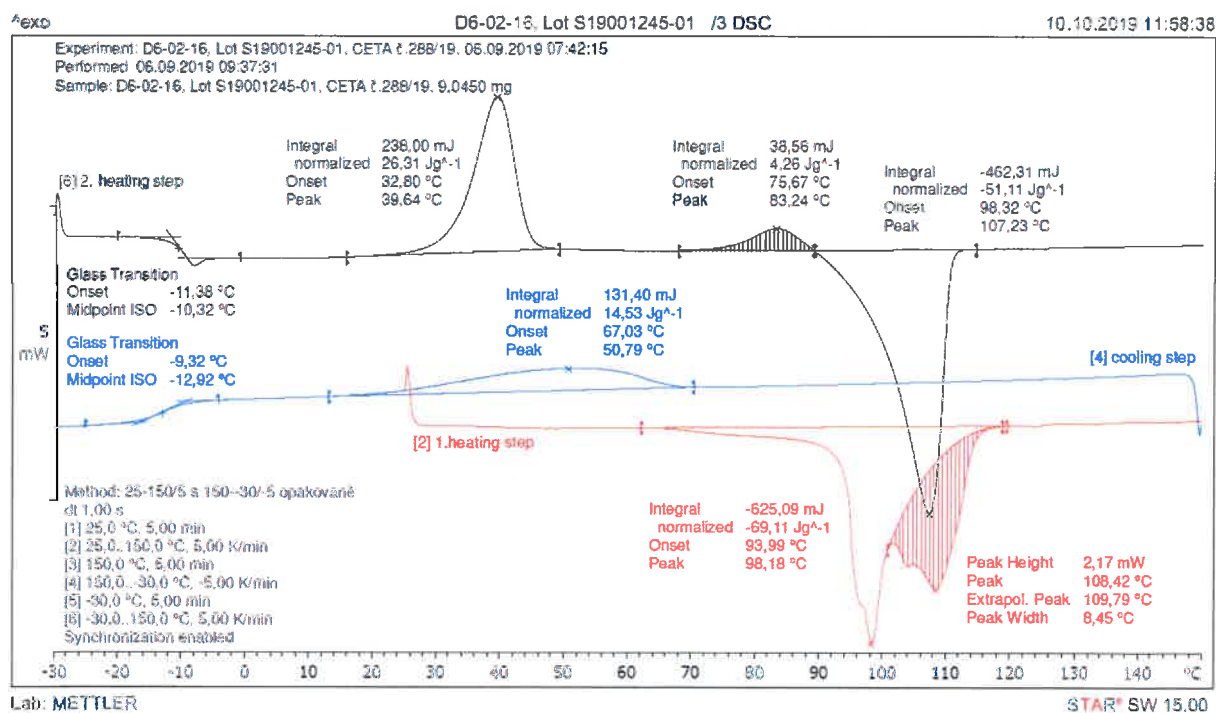

### Termogravimetrická analýza

Na obrázcích č. 4 a 5 jsou zobrazena měření TGA u vzorku D6-02-16, Lot S19001245-01, CETA č. 288/19. Na hmotnostní křivce (černá křivka) nebyl zaznamenán žádný hmotnostní úbytek od 25 °C do 220 °C. Od cca 220 °C začíná termický rozklad polymeru. Na křivce tepelného toku (modrá křivka) byl zaznamenán zdvojený endotermický pík charakterizovaný onset teplotou 94,70 °C (1. měření) a 92,78 °C (2. měření), odpovídající tání polymeru. Druhý endotermický pík odpovídá termickému rozkladu polymeru a je charakterizovaný onset teplotou 270,36 °C (1. měření) a 264,67 °C (2. měření).

Obrázek č. 4: TGA vzorku D6-02-16, Lot S19001245-01, CETA č. 288/19 (1. měření)

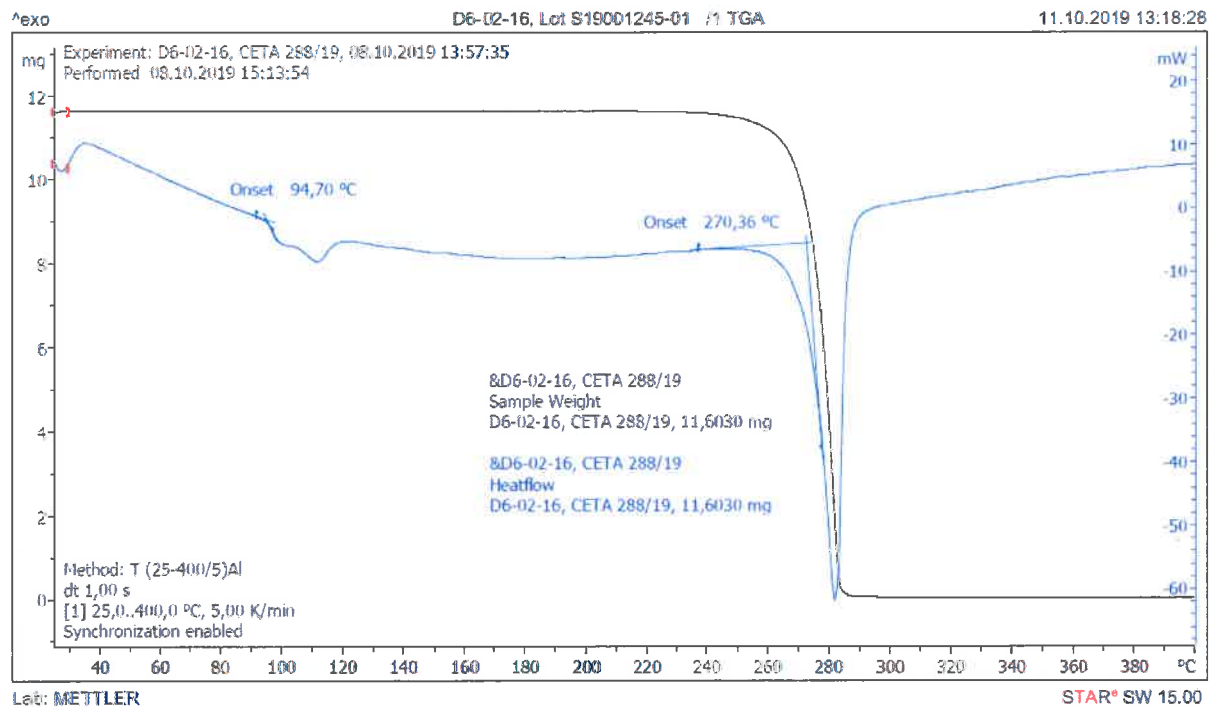

Obrázek č. 5: TGA vzorku D6-02-16, Lot S19001245-01, CETA č. 288/19 (2. měření)

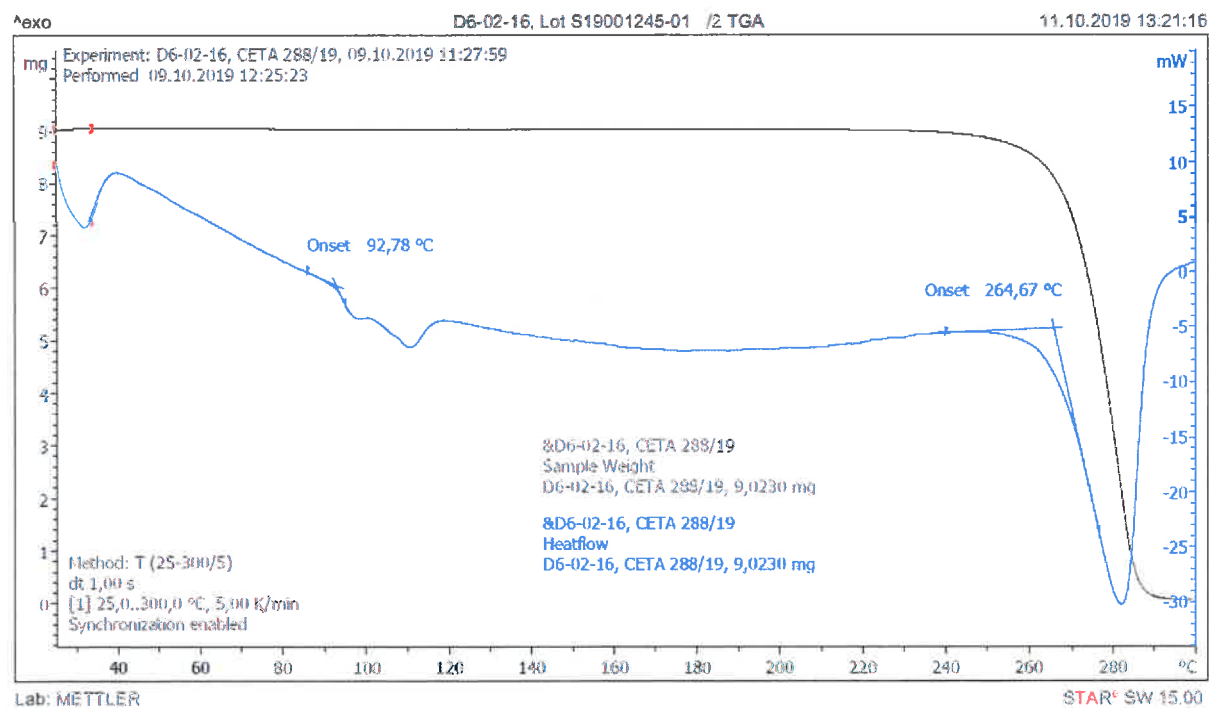

**č. 19-0860-61**

|                 |                                                               |               |           |
|-----------------|---------------------------------------------------------------|---------------|-----------|
| Název:          | <b>Termická analýza biodegradabilního polymeru</b>            |               |           |
| Přijetí vzorku: | 05. 09. 2019                                                  |               |           |
| Vypracoval:     | Z. Křenková                                                   | Zkontroloval: | T. Čermák |
| Zadavatel:      | ELLA-CS s.r.o., Milady Horákové 504/45, 500 06 Hradec Králové |               |           |

**Výsledky:**

Byla provedena termická analýza biodegradabilního polymeru:

D6-02-04, Lot S19001245-01, CETA č. 289/19 (4 týdny degradovaný)

Výsledky diferenciální skenovací kalorimetrie (DSC) jsou uvedeny v tabulce č. 1 (teploty tání a krystalizace, entalpie tání a studené krystalizace, skelný přechod) a v tabulce č. 2 (krystalinita). Měření DSC jsou zobrazena na obrázcích č. 1 – 3.

Měření termogravimetrické analýzy (TGA) jsou zobrazena na obrázcích č. 4 a 5.

**Poznámky:**

Analýza byla provedena v souladu s normami:

- ČSN EN ISO 11357-1 Plasty – Diferenciální snímací kalorimetrie (DSC) – Část 1: Základní principy
- ČSN EN ISO 11357-2 Plasty - Diferenciální snímací kalorimetrie (DSC) – Část 2: Stanovení teploty a výšky skoku skelného přechodu
- ČSN EN ISO 11357-3 Plasty - Diferenciální snímací kalorimetrie (DSC) – Část 3: Stanovení teploty a entalpie tání a krystalizace
- ČSN EN ISO 11358-1 Plasty – Termogravimetrie (TG) polymerů – Část 1: Obecné principy

**Ing. Michal Bartoš**

Vedoucí úseku ANALYTIKA

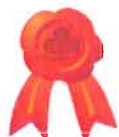

Signature valid  
Digitálně podepsáno  
Jméno: Ing. Michal Bartoš  
Datum: 16.10.2019 16:47:54

**Analyzovaný vzorek:**

D6-02-04, Lot S19001245-01, CETA č. 289/19 (4 týdny degradovaný)  
Materiál polydioxanon (PDO).  
(Skládování v exsikátoru při laboratorní teplotě)

**Diferenční skenovací kalorimetrie****Přístrojové vybavení:**

DSC823<sup>e</sup> Mettler Toledo

- Měřicí teplotní rozsah: 203 – 973 K (-70 to 700 °C)
- Rozlišení: přibližně 0.07 µW
- Měřicí kelímek: hliníkový kelímek (100µl), zalisovaný víčkem s otvorem vytvořeným speciálním bodlem
- Referenční kelímek: prázdný hliníkový kelímek (100µl), zalisovaný víčkem s otvorem vytvořeným speciálním bodlem

S ohledem na požadavky hodnocení krystalinity byly vzorky navažovány na mikrováhách (součást zařízení TGA/DSC1 Mettler Toledo).

**Metoda:**

| Krok |                           | Teplotní rozsah [°C] | Čas isotermy [min]/<br>teplotní gradient [°C/min] |
|------|---------------------------|----------------------|---------------------------------------------------|
| 1.   | isotermický krok          | 25                   | 5 min                                             |
| 2.   | dynamický krok – 1.ohřev  | 25 – 150             | 5 °C/min                                          |
| 3.   | isotermický krok          | 150                  | 5 min                                             |
| 4.   | dynamický krok – chlazení | 150 – -30            | 5 °C/min                                          |
| 5.   | isotermický krok          | -30                  | 5 min                                             |
| 6.   | dynamický krok – 2.ohřev  | -30 – 150            | 5 °C/min                                          |

**Termogravimetrická analýza****Přístrojové vybavení:**

TGA/DSC1 Mettler Toledo

- Teplotní rozsah: 298 – 1373 K (25 – 1100 °C)
- Citlivost: 0.5 mW
- Teplotní rozlišení: 0.005 K
- Měřicí kelímek: hliníkový kelímek (100µl), zalisovaný víčkem s otvorem vytvořeným speciálním bodlem

**Metoda:**

Teplotní rozsah [°C] 25 – 400 °C (1.měření) a 25 – 300 °C (2. měření)  
teplotní gradient [°C/min] 5 °C/min  
Průtok inertního plynu (dusík) byl nastaven na cca 80 ml/min.



### Hodnocení a závěr:

### Diferenční skenovací kalorimetrie

Tabulka č. 1: Termická charakterizace vzorku D6-02-04, Lot S19001245-01, CETA č. 289/19 (4 týdny degradovaní)

| Stanovení č. | Teplota tání                |             |             | Entalpie tání | Teplota krystalizace        |           | Sklenný přechod | Entalpie studené krystalizace | Entalpie studené krystalizace (premelting) | Entalpie tání |
|--------------|-----------------------------|-------------|-------------|---------------|-----------------------------|-----------|-----------------|-------------------------------|--------------------------------------------|---------------|
|              | T <sub>m</sub> (onset) [°C] | Peak 1 [°C] | Peak 2 [°C] |               | T <sub>c</sub> (onset) [°C] | Peak [°C] |                 |                               |                                            |               |
|              | 1. ohřev                    |             |             | 1. ohřev      |                             | chlazení  |                 | 2. ohřev                      |                                            | 2. ohřev      |
|              | 1                           | 95,92       | 101,67      | 109,98        | 76,18                       | 64,36     | 47,30           | -10,31                        | 23,92                                      | 6,17          |
| 2            | 96,09                       | 100,68      | 109,51      | 76,94         | 64,98                       | 48,97     | -10,56          | 23,40                         | 6,05                                       | 59,13         |
| 3            | 95,84                       | 100,91      | 110,17      | 79,07         | 64,78                       | 46,72     | -10,06          | 22,74                         | 6,48                                       | 59,78         |
| Průměr       | 96,0                        | 101,1       | 109,9       | 77,4          | 64,7                        | 47,7      | -10,3           | 23,4                          | 6,2                                        | 59,2          |
| SD           | 0,1                         | 0,5         | 0,3         | 1,5           | 0,3                         | 1,2       | 0,3             | 0,6                           | 0,2                                        | 0,6           |

Onset teplota ..... extrapolovaná počáteční teplota (průsečík extrapolované základní čáry tepelného toku s tečnou v inflexním bodu píku)

### Výpočty:

$$X_c = \frac{\Delta H_f - \Delta H_c}{\Delta H_f 100\%} \times 100$$

X<sub>c</sub>.....Krystalinita; procentuální podíl krystalické fáze polymeru [%]

ΔH<sub>f</sub>.....Entalpie tání; teplo pohlcené v průběhu tání vzorku [J/g]

ΔH<sub>c</sub> .....Entalpie studené krystalizace; teplo uvolněné v průběhu studené krystalizace vzorku [J/g]

ΔH<sub>f</sub> 100%.....Teoretická hodnota entalpie tání 100% krystalického polymeru PDO [J/g]; 141,18 J/g (zdroj: Thermal properties and non-isothermal crystallization behavior of biodegradable poly(p-dioxanone)/poly(vinyl alcohol) blends; DOI: 10.1002/pi.1904)

Krystalinita polymeru (X<sub>c</sub>) vyhodnocená během 1. ohřevu charakterizuje polymer ("as received") s jeho teplotní a mechanickou historií (vliv výrobního postupu, skladování atd.). Krystalinita vyhodnocená během 2. ohřevu charakterizuje polymer po vymazání jeho teplotní i mechanické historie a slouží především ke srovnávání polymerních materiálů vzájemně.

Tabulka č. 2: Krystalinita vzorku D6-02-04, Lot S19001245-01, CETA č. 289/19 (4 týdny degradovaný) vyhodnocená během 1. a 2. ohřevu

| Stanovení č.  | Krystalinita, $X_c$ [%] |             |
|---------------|-------------------------|-------------|
|               | 1. ohřev                | 2. ohřev    |
| 1             | 53,96                   | 20,19       |
| 2             | 54,50                   | 21,02       |
| 3             | 56,01                   | 21,65       |
| <b>Průměr</b> | <b>54,8</b>             | <b>21,0</b> |
| SD            | 1,1                     | 0,7         |

Obrázek č. 1: DSC vzorku D6-02-04, Lot S19001245-01, CETA č. 289/19 (4 týdny degradovaný) (1. měření)

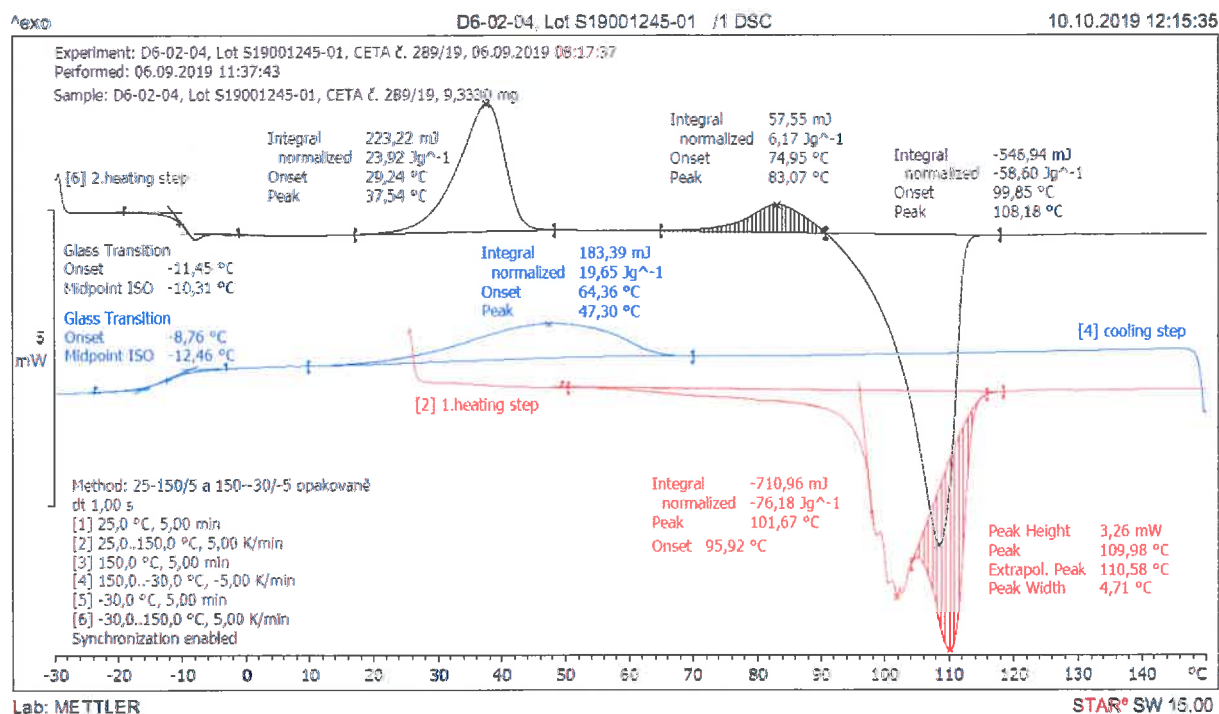

Obrázek č. 2: DSC vzorku D6-02-04, Lot S19001245-01, CETA č. 289/19 (4 týdny degradovaný) (2. měření)

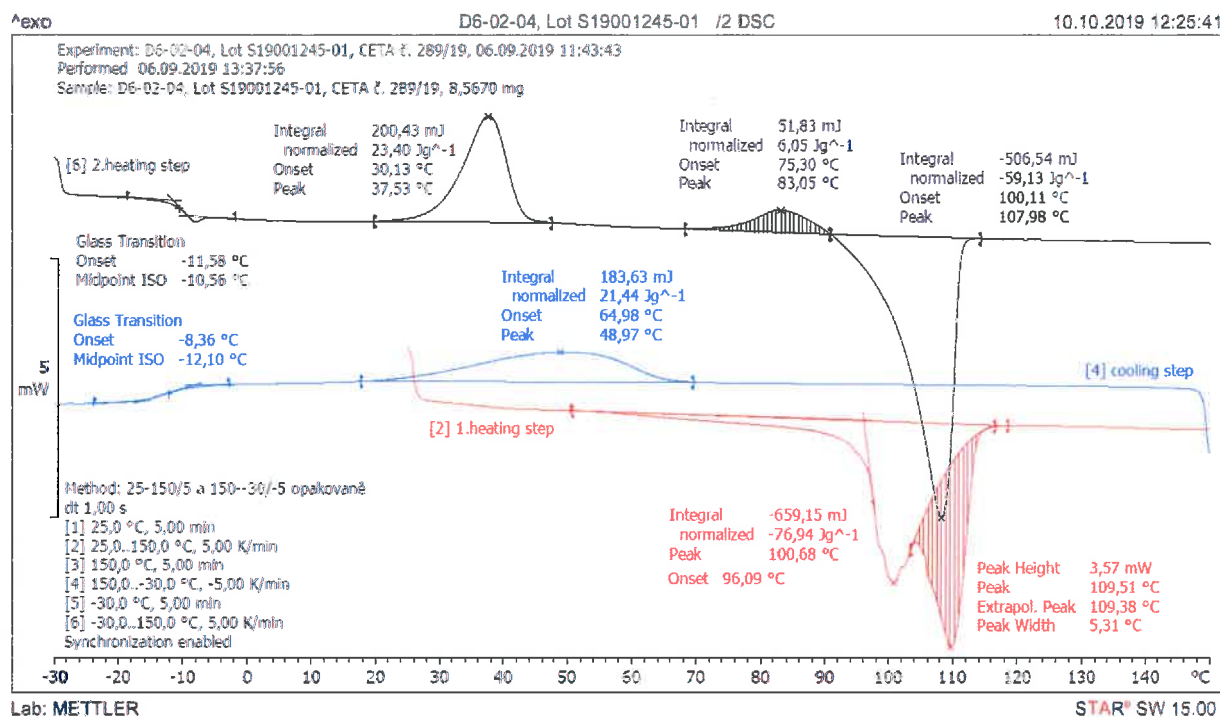

Obrázek č. 3: DSC vzorku D6-02-04, Lot S19001245-01, CETA č. 289/19 (4 týdny degradovaný) (3. měření)

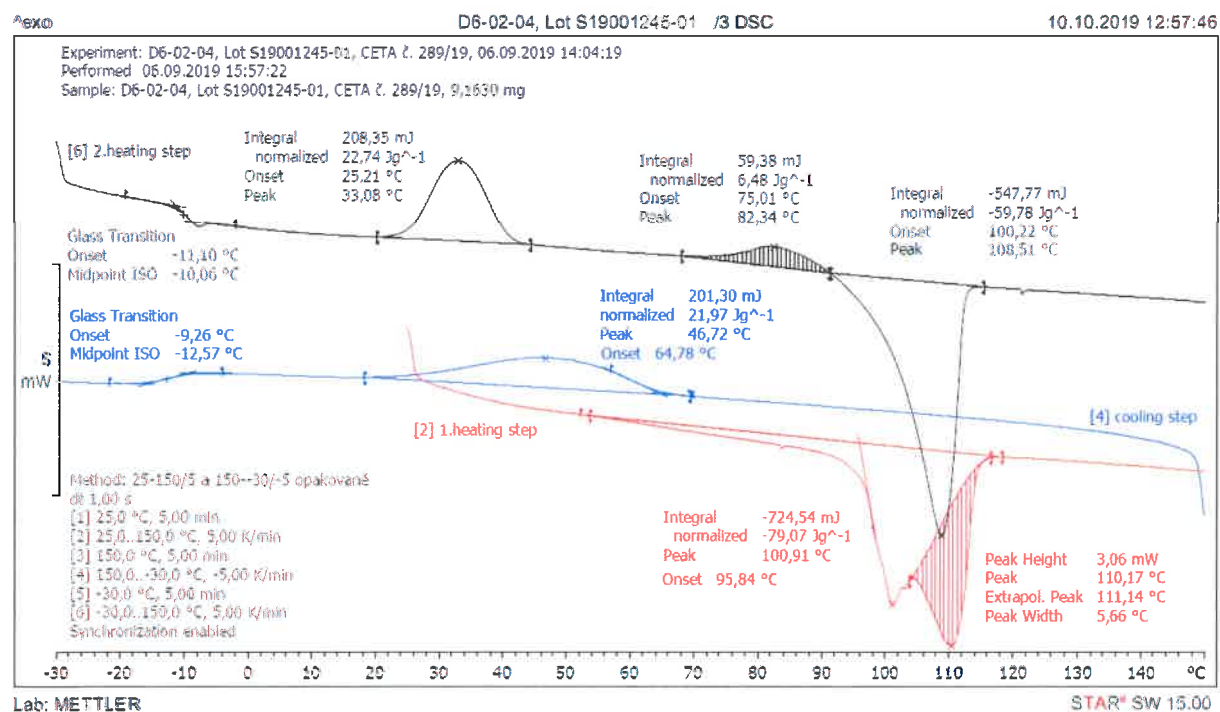

### Termogravimetrická analýza

Na obrázcích č. 4 a 5 jsou zobrazena měření TGA u vzorku D6-02-04, Lot S19001245-01, CETA č. 289/19 (4 týdny degradovaný). Na hmotnostní křivce (černá křivka) nebyl zaznamenán žádný hmotnostní úbytek od 25 °C do 220 °C. Od cca 220 °C začíná termický rozklad polymeru. Na křivce tepelného toku (modrá křivka) byl zaznamenán zdvojený endotermický pík charakterizovaný onset teplotou 96,35 °C (1. měření) a 95,88 °C (2. měření), odpovídající tání polymeru. Druhý endotermický pík odpovídá termickému rozkladu polymeru a je charakterizovaný onset teplotou 270,27 °C (1. měření) a 270,83 °C (2. měření).

Obrázek č. 4: TGA vzorku D6-02-04, Lot S19001245-01, CETA č. 289/19 (4 týdny degradovaný) (1. měření)

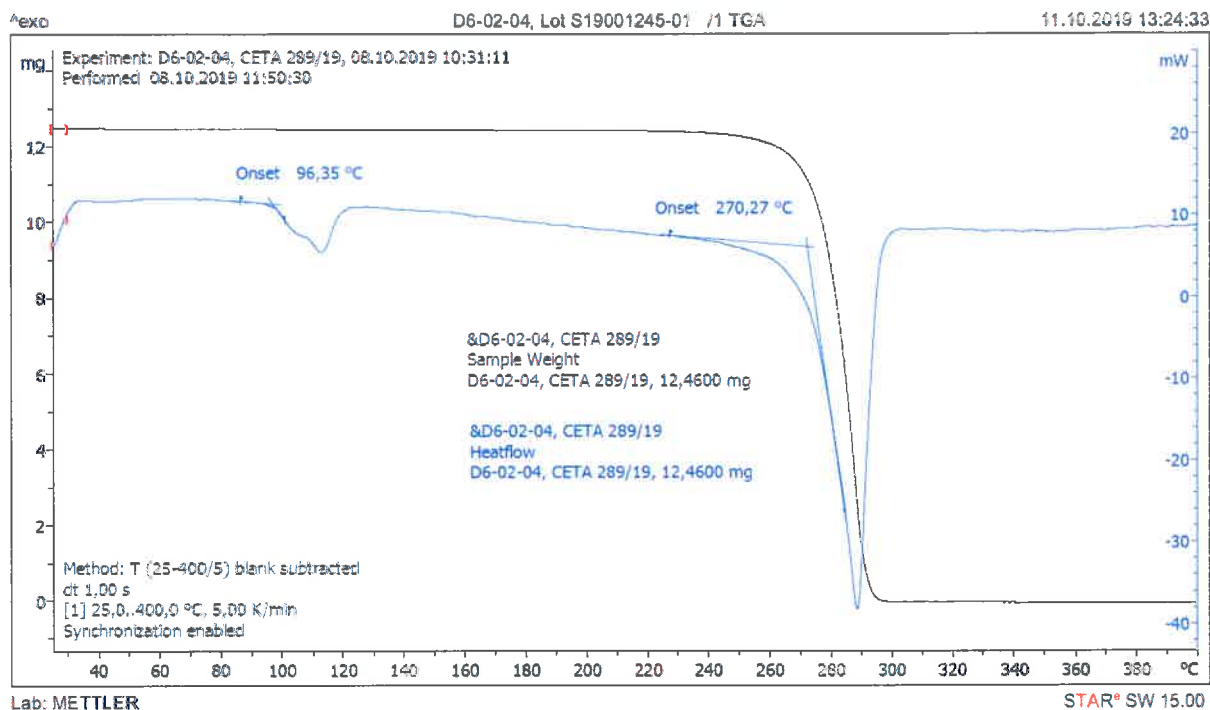

Obrázek č. 5: TGA vzorku D6-02-04, Lot S19001245-01, CETA č. 289/19 (4 týdny degradovaný) (2. měření)

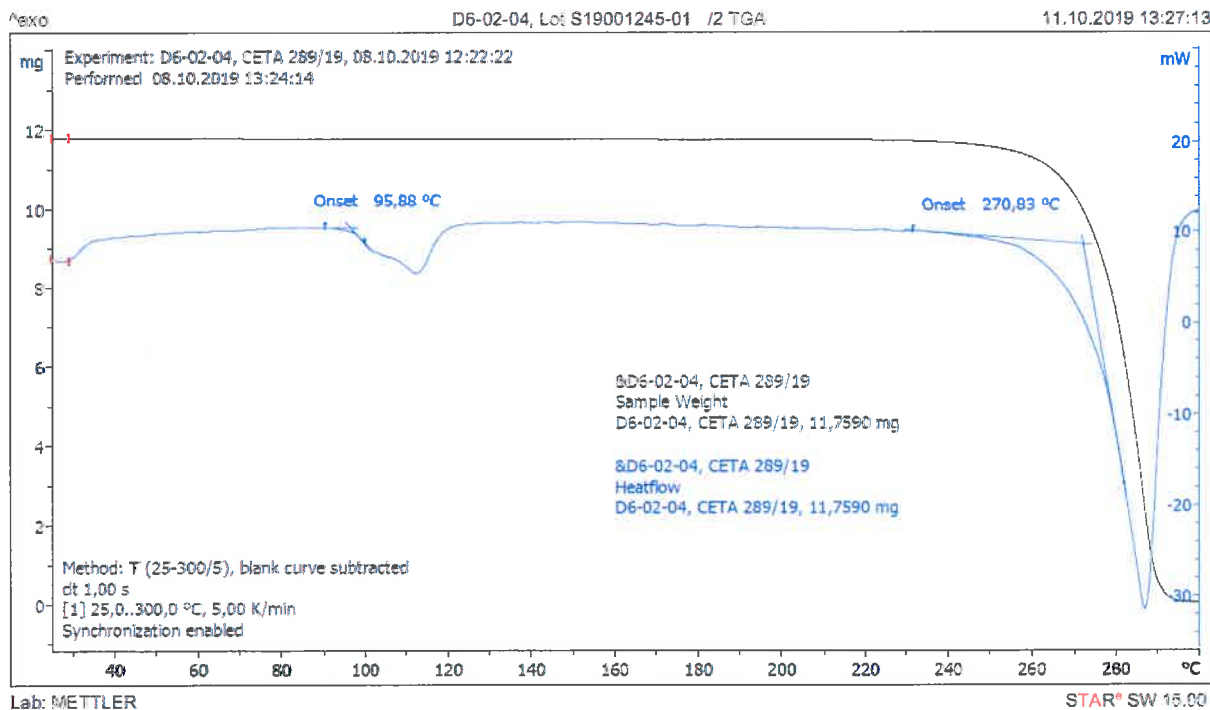

**č. 19-1045-61**

|                 |                                                               |               |           |
|-----------------|---------------------------------------------------------------|---------------|-----------|
| Název:          | <b>Termická analýza biodegradabilního polymeru</b>            |               |           |
| Přijetí vzorku: | 02. 10. 2019                                                  |               |           |
| Vypracoval:     | Z. Křenková                                                   | Zkontroloval: | T. Čermák |
| Zadavatel:      | ELLA-CS s.r.o., Milady Horákové 504/45, 500 06 Hradec Králové |               |           |

**Výsledky:**

Byla provedena termická analýza biodegradabilního polymeru:

D6-02-07, Lot S19001245-01, CETA č. 315/19 (8 týdnů degradovaný)

Výsledky diferenciální skenovací kalorimetrie (DSC) jsou uvedeny v tabulce č. 1 (teploty tání a krystalizace, entalpie tání a studené krystalizace, skelný přechod) a v tabulce č. 2 (krystalinita).

Měření DSC jsou zobrazena na obrázcích č. 1 – 3.

Měření termogravimetrické analýzy (TGA) jsou zobrazena na obrázcích č. 4 a 5.

**Poznámky:**

Analýza byla provedena v souladu s normami:

- ČSN EN ISO 11357-1 Plasty – Diferenciální snímací kalorimetrie (DSC) – Část 1: Základní principy
- ČSN EN ISO 11357-2 Plasty - Diferenciální snímací kalorimetrie (DSC) – Část 2: Stanovení teploty a výšky skoku skelného přechodu
- ČSN EN ISO 11357-3 Plasty - Diferenciální snímací kalorimetrie (DSC) – Část 3: Stanovení teploty a entalpie tání a krystalizace
- ČSN EN ISO 11358-1 Plasty – Termogravimetrie (TG) polymerů – Část 1: Obecné principy

**Ing. Michal Bartoš**

Vedoucí úseku ANALYTIKA

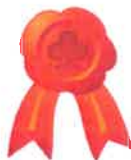

Signature valid

Digitálně podepsáno

Jméno: Ing. Michal Bartoš

Datum: 02.10.2019

14:04:49

**Analyzovaný vzorek:**

Název: D6-02-07, Lot S19001245-01, CETA č. 315/19 (8 týdnů degradovaný)

Materiál: Polydioxanon (PDO).

Skládování: Exsikátor, laboratorní teplota

**Diferenční skenovací kalorimetrie****Přístrojové vybavení:**DSC823<sup>e</sup> Mettler Toledo

- Měřicí teplotní rozsah: 203 – 973 K (-70 to 700 °C)
- Rozlišení: přibližně 0.07 µW
- Měřicí kelímek: hliníkový kelímek (100µl), zalisovaný víčkem s otvorem vytvořeným speciálním bodlem
- Referenční kelímek: prázdný hliníkový kelímek (100µl), zalisovaný víčkem s otvorem vytvořeným speciálním bodlem

S ohledem na požadavky hodnocení krystalinity byly vzorky navažovány na mikrovahách (součást zařízení TGA/DSC1 Mettler Toledo).

**Metoda:**

| Krok |                           | Teplotní rozsah [°C] | Čas isotermy [min]/<br>teplotní gradient [°C/min] |
|------|---------------------------|----------------------|---------------------------------------------------|
| 1.   | isotermický krok          | 25                   | 5 min                                             |
| 2.   | dynamický krok – 1.ohřev  | 25 – 150             | 5 °C/min                                          |
| 3.   | isotermický krok          | 150                  | 5 min                                             |
| 4.   | dynamický krok – chlazení | 150 – -30            | 5 °C/min                                          |
| 5.   | isotermický krok          | -30                  | 5 min                                             |
| 6.   | dynamický krok – 2.ohřev  | -30 – 150            | 5 °C/min                                          |

**Termogravimetrická analýza****Přístrojové vybavení:**

TGA/DSC1 Mettler Toledo

- Teplotní rozsah: 298 – 1373 K (25 – 1100 °C)
- Citlivost: 0.5 mW
- Teplotní rozlišení: 0.005 K
- Měřicí kelímek: hliníkový kelímek (100µl), zalisovaný víčkem s otvorem vytvořeným speciálním bodlem

**Metoda:**

| Krok |                | Teplotní rozsah [°C] | Teplotní gradient [°C/min] |
|------|----------------|----------------------|----------------------------|
| 1.   | dynamický krok | 25 – 400             | 5                          |

Průtok inertního plynu (dusík) byl nastaven na cca 80 ml/min.

## Hodnocení a závěr:

## Diferenční skenovací kalorimetrie

Tabulka č. 1: Termická charakterizace vzorku D6-02-07, Lot S19001245-01, CETA č. 315/19 (8 týdnů degradovaný)

| Stanovení č. | Teplota tání                |             |             | Entalpie tání | Teplota krystalizace        |           | Skelný přechod | Entalpie studené krystalizace | Entalpie studené krystalizace (premelting) | Entalpie tání |
|--------------|-----------------------------|-------------|-------------|---------------|-----------------------------|-----------|----------------|-------------------------------|--------------------------------------------|---------------|
|              | T <sub>m</sub> (onset) [°C] | Peak 1 [°C] | Peak 2 [°C] |               | T <sub>c</sub> (onset) [°C] | Peak [°C] |                |                               |                                            |               |
|              |                             |             |             |               |                             |           |                |                               |                                            |               |
| 1            | 100,87                      | -           | 111,15      | 86,83         | 69,94                       | 50,49     | -12,64         | 12,10                         | 9,33                                       | 72,74         |
| 2            | 101,29                      | -           | 111,22      | 86,10         | 69,62                       | 50,74     | -12,52         | 12,50                         | 7,02                                       | 75,32         |
| 3            | 101,63                      | -           | 111,29      | 84,95         | 68,75                       | 52,40     | -12,55         | 10,30                         | 8,52                                       | 71,93         |
| Průměr       | 101,3                       | -           | 111,2       | 86,0          | 69,4                        | 51,2      | -12,6          | 11,6                          | 8,3                                        | 73,3          |
| SD           | 0,4                         | -           | 0,1         | 0,9           | 0,6                         | 1,0       | 0,1            | 1,2                           | 1,2                                        | 1,8           |

Onset teplota ..... extrapolovaná počáteční teplota (průsečík extrapolované základní čáry tepelného toku s tečnou v inflexním bodu píku)

## Výpočty:

$$X_c = \frac{\Delta H_f - \Delta H_c}{\Delta H_f 100\%} \times 100$$

X<sub>c</sub>.....Krystalinita; procentuální podíl krystalické fáze polymeru [%]

ΔH<sub>f</sub>.....Entalpie tání; teplo pohlcené v průběhu tání vzorku [J/g]

ΔH<sub>c</sub>.....Entalpie studené krystalizace; teplo uvolněné v průběhu studené krystalizace vzorku [J/g]

ΔH<sub>f</sub> 100%.....Teoretická hodnota entalpie tání 100% krystalického polymeru PDO [J/g]; 141,18 J/g (zdroj: Thermal properties and non-isothermal crystallization behavior of biodegradable poly(p-dioxanone)/poly(vinyl alcohol) blends; DOI: 10.1002/pi.1904)

Krystalinita polymeru (X<sub>c</sub>) vyhodnocená během 1. ohřevu charakterizuje polymer ("as received") s jeho teplotní a mechanickou historií (vliv výrobního postupu, skladování atd.). Krystalinita vyhodnocená během 2. ohřevu charakterizuje polymer po vymazání jeho teplotní i mechanické historie a slouží především ke srovnávání polymerních materiálů vzájemně.

Tabulka č. 2: Krystalinita vzorku D6-02-07, Lot S19001245-01, CETA č. 315/19 (8 týdnů degradovaný) vyhodnocená během 1. a 2. ohřevu

| Stanovení č.  | Krystalinita, $X_c$ [%] |             |
|---------------|-------------------------|-------------|
|               | 1. ohřev                | 2. ohřev    |
| 1             | 61,50                   | 36,34       |
| 2             | 60,99                   | 39,52       |
| 3             | 60,17                   | 37,62       |
| <b>Průměr</b> | <b>60,9</b>             | <b>37,8</b> |
| SD            | 0,7                     | 1,6         |

Obrázek č. 1: DSC vzorku D6-02-07, Lot S19001245-01, CETA č. 315/19 (8 týdnů degradovaný) (1. měření)

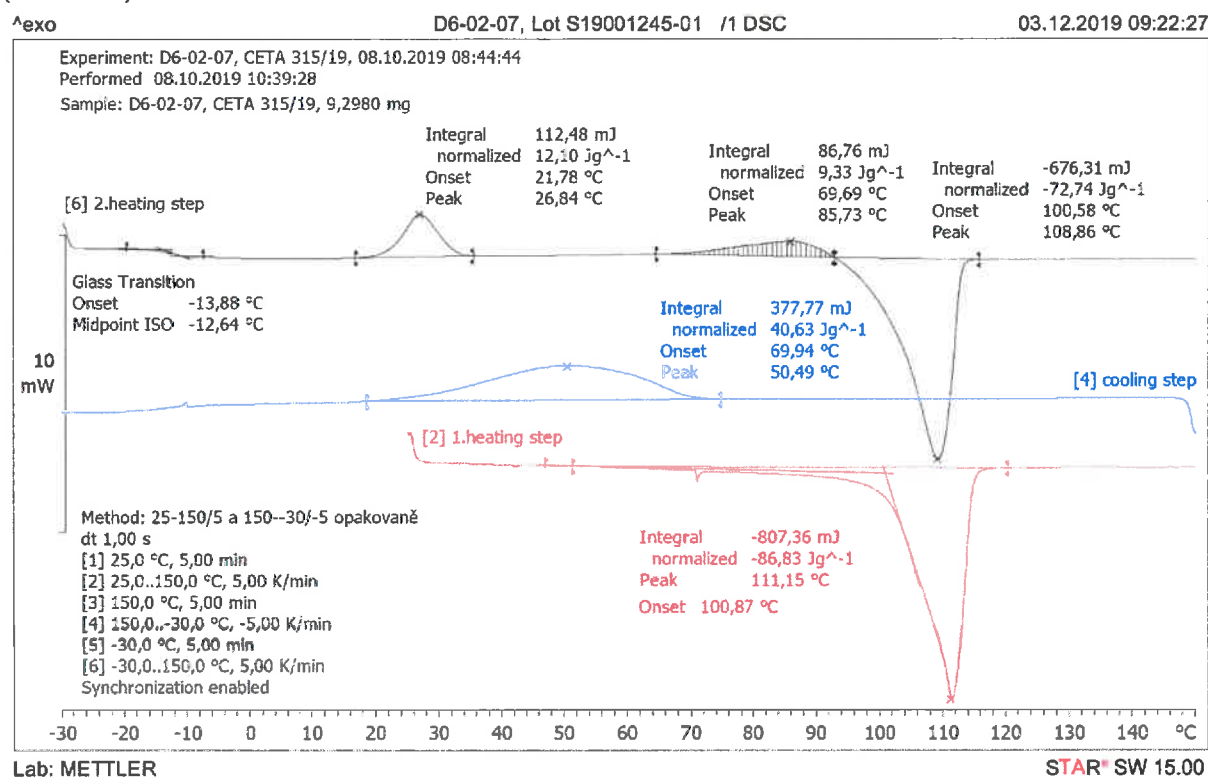



Obrázek č. 2: DSC vzorku D6-02-07, Lot S19001245-01, CETA č. 315/19 (8 týdnů degradovaný) (2. měření)

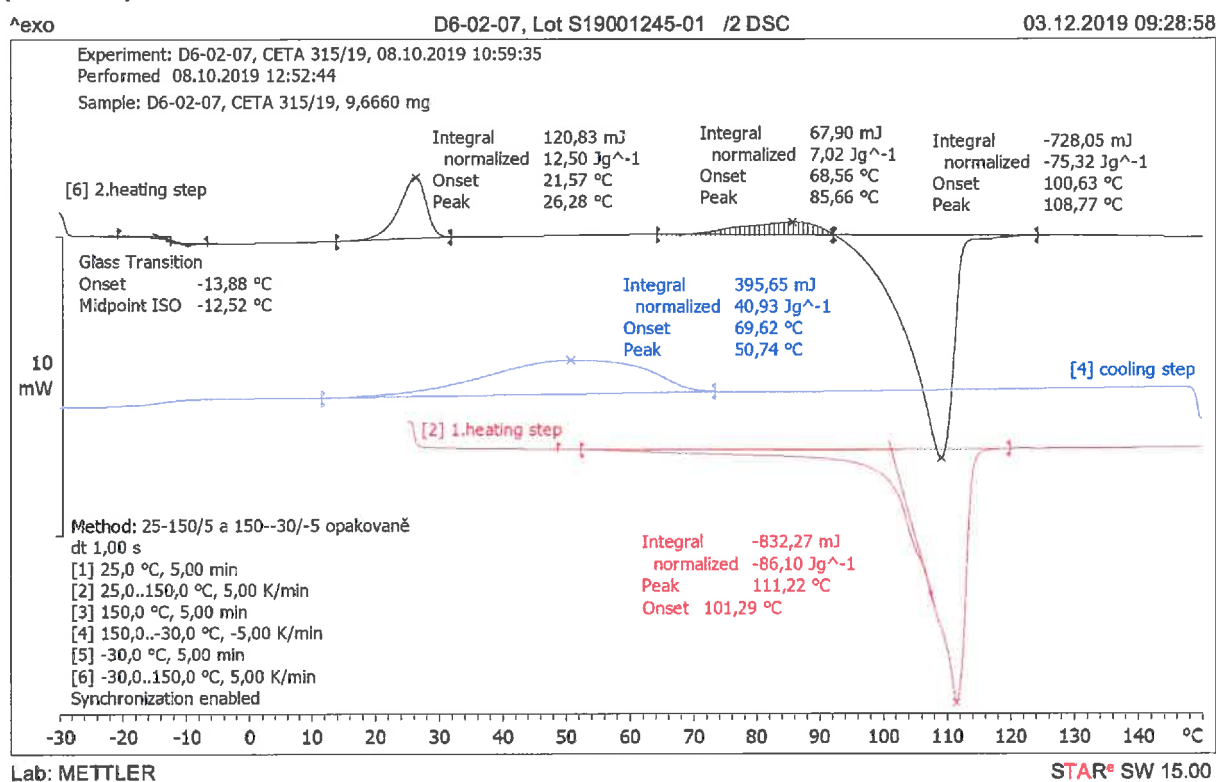

Obrázek č. 3: DSC vzorku D6-02-07, Lot S19001245-01, CETA č. 315/19 (8 týdnů degradovaný) (3. měření)

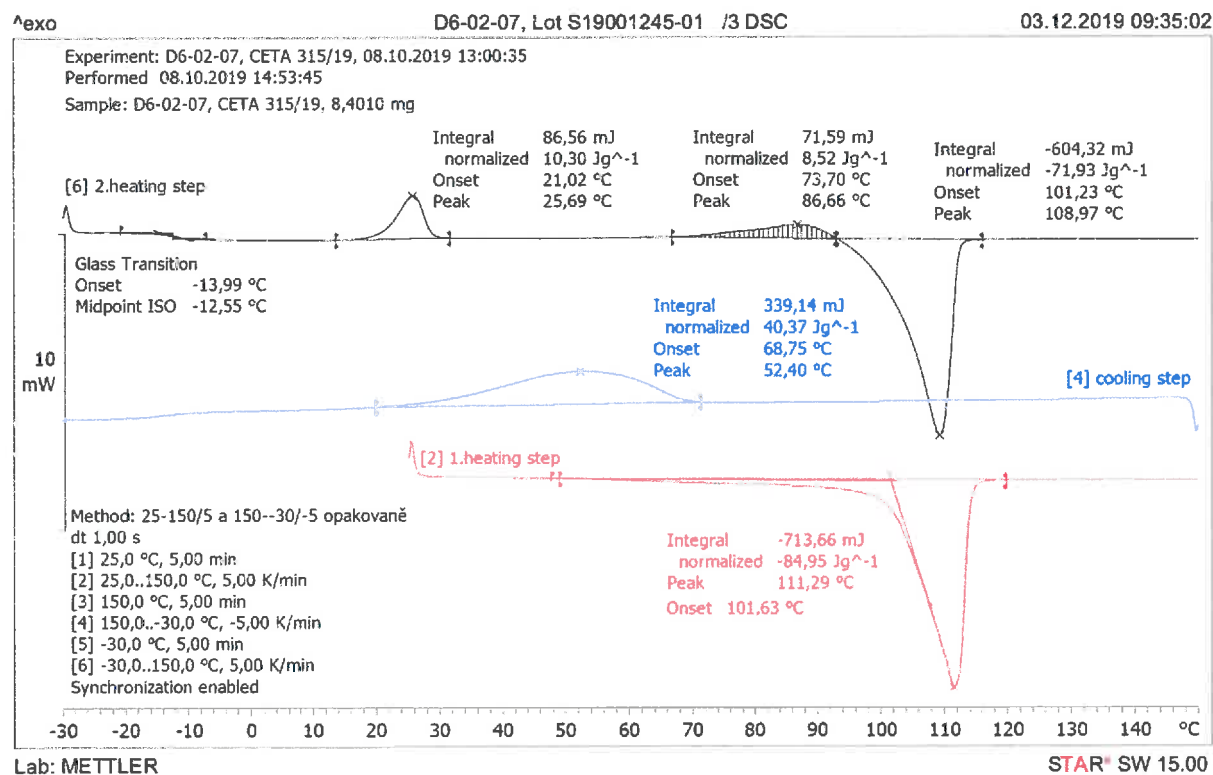

**Termogravimetrická analýza**

Na obrázcích č. 4 a 5 jsou zobrazena měření TGA u vzorku D6-02-07, Lot S19001245-01, CETA č. 315/19 (8 týdnů degradovaný). Na hmotnostní křivce (černá křivka) nebyl zaznamenán žádný hmotnostní úbytek od 25 °C do 180 °C. Od cca 180 °C začíná termický rozklad polymeru. Na křivce tepelného toku (modrá křivka) byl zaznamenán endotermický pík charakterizovaný teplotou píku 112,24 °C (1. měření) a 112,18 °C (2. měření), odpovídající tání polymeru. Druhý endotermický pík odpovídá termickému rozkladu polymeru a je charakterizovaný onset teplotou 254,21 °C (1. měření) a 262,23 °C (2. měření).

Obrázek č. 4: TGA vzorku D6-02-07, Lot S19001245-01, CETA č. 315/19 (8 týdnů degradovaný) (1. měření)

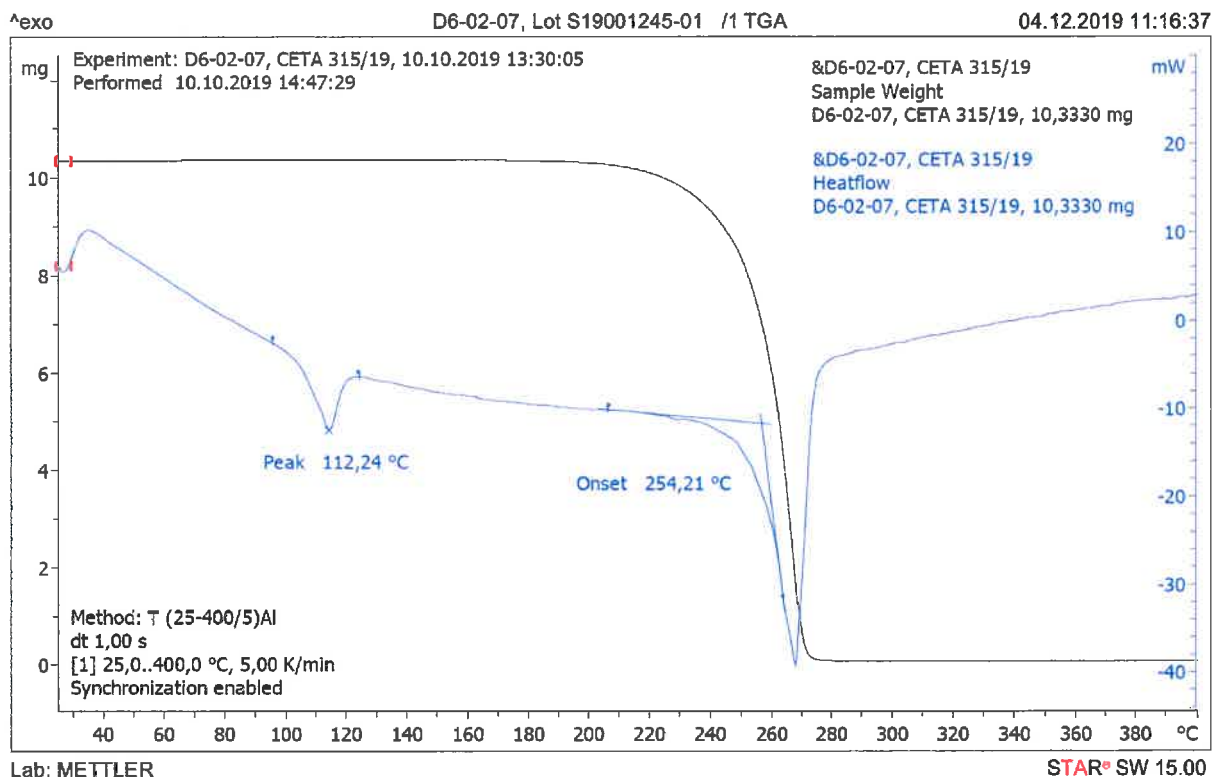

Obrázek č. 5: TGA vzorku D6-02-07, Lot S19001245-01, CETA č. 315/19 (8 týdnů degradovaný) (2. měření)

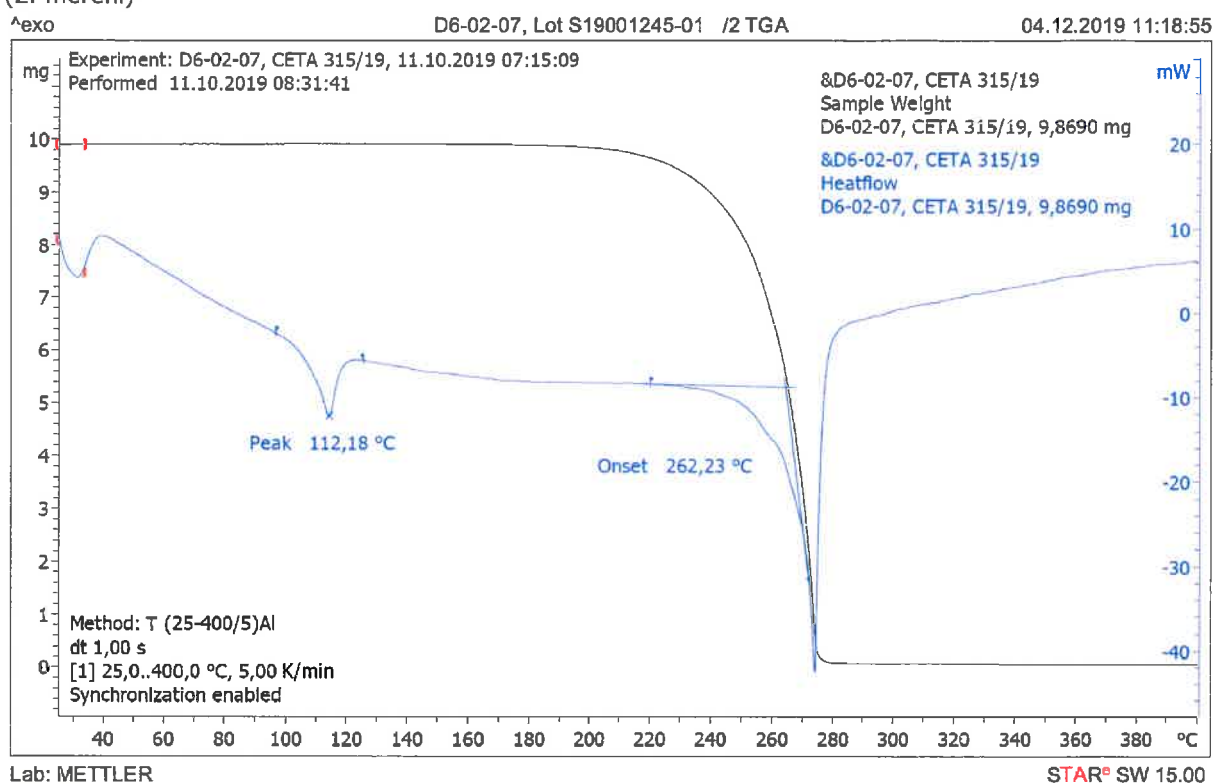



**č. 20-0204-61**

|                 |                                                               |               |           |
|-----------------|---------------------------------------------------------------|---------------|-----------|
| Název:          | <b>Termická analýza biodegradabilního polymeru</b>            |               |           |
| Přijetí vzorku: | 27. 11. 2019                                                  |               |           |
| Vypracoval:     | Z. Křenková                                                   | Zkontroloval: | T. Čermák |
| Zadavatel:      | ELLA-CS s.r.o., Milady Horákové 504/45, 500 06 Hradec Králové |               |           |

**Výsledky:**

Byla provedena termická analýza biodegradabilního polymeru:

D6-02-10, Lot S19001245-01, CETA č. 368/19 (16 týdnů degradovaný)

Výsledky diferenciální skenovací kalorimetrie (DSC) jsou uvedeny v tabulce č. 1 (teploty tání a krystalizace, entalpie tání a studené krystalizace, skelný přechod) a v tabulce č. 2 (krystalinita).

Měření DSC jsou zobrazena na obrázcích č. 1 – 3.

Měření termogravimetrické analýzy (TGA) jsou zobrazena na obrázcích č. 4 a 5.

**Poznámky:**

Analýza byla provedena v souladu s normami:

- ČSN EN ISO 11357-1 Plasty – Diferenciální snímací kalorimetrie (DSC) – Část 1: Základní principy
- ČSN EN ISO 11357-2 Plasty – Diferenciální snímací kalorimetrie (DSC) – Část 2: Stanovení teploty a výšky skoku skelného přechodu
- ČSN EN ISO 11357-3 Plasty – Diferenciální snímací kalorimetrie (DSC) – Část 3: Stanovení teploty a entalpie tání a krystalizace
- ČSN EN ISO 11358-1 Plasty – Termogravimetrie (TG) polymerů – Část 1: Obecné principy

**Ing. Michal Bartoš**

Vedoucí úseku ANALYTIKA

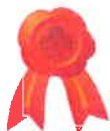

Signature valid  
Digitálně podepsáno  
Jméno: Ing. Michal Bartoš  
Datum: 04.03.2020 09:59:07

**Analyzovaný vzorek:**

Název: D6-02-10, Lot S19001245-01, CETA č. 368/19 (16 týdnů degradovaný)

Materiál: Polydioxanon (PDO).

Skládování: Exsikátor, laboratorní teplota

**Diferenční skenovací kalorimetrie****Přístrojové vybavení:**DSC823<sup>e</sup> Mettler Toledo

- Měřicí teplotní rozsah: 203 – 973 K (-70 to 700 °C)
- Rozlišení: přibližně 0.07 µW
- Měřicí kelímek: hliníkový kelímek (100µl), zalisovaný víčkem s otvorem vytvořeným speciálním bodlem
- Referenční kelímek: prázdný hliníkový kelímek (100µl), zalisovaný víčkem s otvorem vytvořeným speciálním bodlem

S ohledem na požadavky hodnocení krystalinity byly vzorky navažovány na mikrováhách (součást zařízení TGA/DSC1 Mettler Toledo).

**Metoda:**

| Krok |                           | Teplotní rozsah [°C] | Čas isotermy [min]/<br>teplotní gradient [°C/min] |
|------|---------------------------|----------------------|---------------------------------------------------|
| 1.   | isotermický krok          | 25                   | 5 min                                             |
| 2.   | dynamický krok – 1.ohřev  | 25 – 150             | 5 °C/min                                          |
| 3.   | isotermický krok          | 150                  | 5 min                                             |
| 4.   | dynamický krok – chlazení | 150 – -30            | 5 °C/min                                          |
| 5.   | isotermický krok          | -30                  | 5 min                                             |
| 6.   | dynamický krok – 2.ohřev  | -30 – 150            | 5 °C/min                                          |

**Termogravimetrická analýza****Přístrojové vybavení:**

TGA/DSC1 Mettler Toledo

- Teplotní rozsah: 298 – 1373 K (25 – 1100 °C)
- Citlivost: 0.5 mW
- Teplotní rozlišení: 0.005 K
- Měřicí kelímek: hliníkový kelímek (100µl), zalisovaný víčkem s otvorem vytvořeným speciálním bodlem

**Metoda:**

| Krok |                | Teplotní rozsah [°C] | Teplotní gradient [°C/min] |
|------|----------------|----------------------|----------------------------|
| 1.   | dynamický krok | 25 – 400             | 5                          |

Průtok inertního plynu (dusík) byl nastaven na cca 80 ml/min.

**Hodnocení a závěr:****Diferenční skenovací kalorimetrie**

Tabulka č. 1: Termická charakterizace vzorku D6-02-10, Lot S19001245-01, CETA č. 368/19 (16 týdnů degradovaný)

| Stanovení<br>č. | Teplota tání                   |                |                | Entalpie<br>tání         | Teplota krystalizace           |              | Sklenný<br>přechod | Entalpie<br>studené<br>krystalizace | Entalpie<br>studené<br>krystalizace<br>(premelting) | Entalpie<br>tání |
|-----------------|--------------------------------|----------------|----------------|--------------------------|--------------------------------|--------------|--------------------|-------------------------------------|-----------------------------------------------------|------------------|
|                 | T <sub>m</sub> (onset)<br>[°C] | Peak 1<br>[°C] | Peak 2<br>[°C] | ΔH <sub>f</sub><br>[J/g] | T <sub>c</sub> (onset)<br>[°C] | Peak<br>[°C] |                    | ΔH <sub>c</sub><br>[J/g]            | ΔH <sub>c</sub><br>[J/g]                            |                  |
|                 |                                |                |                | 1.ohřev                  |                                |              |                    | 1.ohřev                             | chlazení                                            |                  |
| 1               | 99,27                          | -              | 110,80         | 96,12                    | 62,52                          | 50,64        | -18,98             | 8,02                                | 9,91                                                | 71,54            |
| 2               | 100,21                         | -              | 111,57         | 97,00                    | 62,52                          | 48,82        | -19,12             | 7,95                                | 9,53                                                | 75,68            |
| 3               | 99,09                          | -              | 111,10         | 101,97                   | 62,89                          | 49,91        | -18,04             | 4,48                                | 10,03                                               | 76,44            |
| Průměr          | 99,5                           | -              | 111,2          | 98,4                     | 62,6                           | 49,8         | -18,7              | 6,8                                 | 9,8                                                 | 74,6             |
| SD              | 0,6                            | -              | 0,4            | 3,2                      | 0,2                            | 0,9          | 0,6                | 2,0                                 | 0,3                                                 | 2,6              |

Onset teplota ..... extrapolovaná počáteční teplota (průsečík extrapolované základní čáry tepelného toku s tečnou v inflexním bodu píku)

**Výpočty:**

$$X_c = \frac{\Delta H_f - \Delta H_c}{\Delta H_f 100\%} \times 100$$

X<sub>c</sub>.....Krystalinita; procentuální podíl krystalické fáze polymeru [%]  
 ΔH<sub>f</sub>.....Entalpie tání; teplo pohlcené v průběhu tání vzorku [J/g]  
 ΔH<sub>c</sub>.....Entalpie studené krystalizace; teplo uvolněné v průběhu studené krystalizace vzorku [J/g]  
 ΔH<sub>f</sub> 100%.....Teoretická hodnota entalpie tání 100% krystalického polymeru PDO [J/g]; 141,18 J/g (zdroj: Thermal properties and non-isothermal crystallization behavior of biodegradable poly(p-dioxanone)/poly(vinyl alcohol) blends; DOI: 10.1002/pi.1904)

Krystalinita polymeru (X<sub>c</sub>) vyhodnocená během 1. ohřevu charakterizuje polymer ("as received") s jeho teplotní a mechanickou historií (vliv výrobního postupu, skladování atd.). Krystalinita vyhodnocená během 2. ohřevu charakterizuje polymer po vymazání jeho teplotní i mechanické historie a slouží především ke srovnávání polymerních materiálů vzájemně.

Tabulka č. 2: Krystalinita vzorku D6-02-10, Lot S19001245-01, CETA č. 368/19 (16 týdnů degradovaný)  
vyhodnocená během 1. a 2. ohřevu

| Stanovení č.  | Krystalinita, $X_c$<br>[%] |             |
|---------------|----------------------------|-------------|
|               | 1. ohřev                   | 2. ohřev    |
| 1             | 68,08                      | 37,97       |
| 2             | 68,71                      | 41,22       |
| 3             | 72,23                      | 43,87       |
| <b>Průměr</b> | <b>69,7</b>                | <b>41,0</b> |
| SD            | 2,2                        | 3,0         |

Obrázek č. 1: DSC vzorku D6-02-10, Lot S19001245-01, CETA č. 368/19 (16 týdnů degradovaný)  
(1. měření)

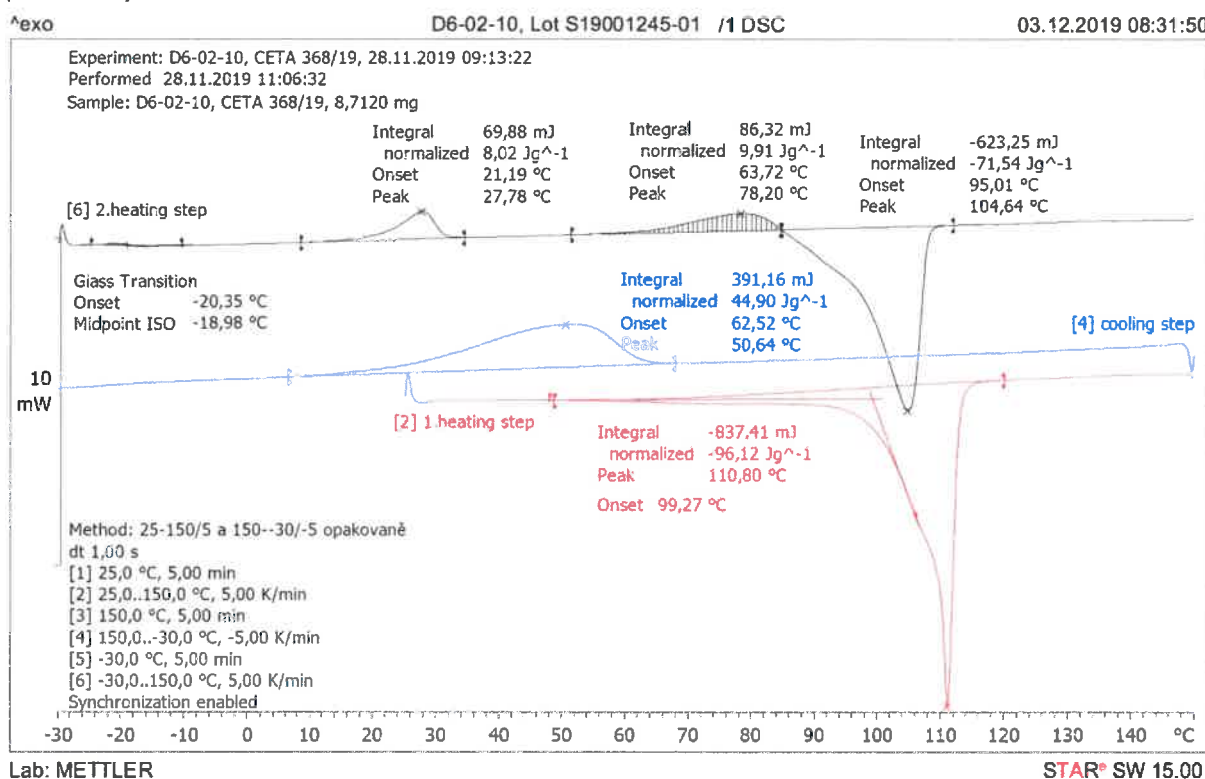



Obrázek č. 2: DSC vzorku D6-02-10, Lot S19001245-01, CETA č. 368/19 (16 týdnů degradovaný) (2. měření)

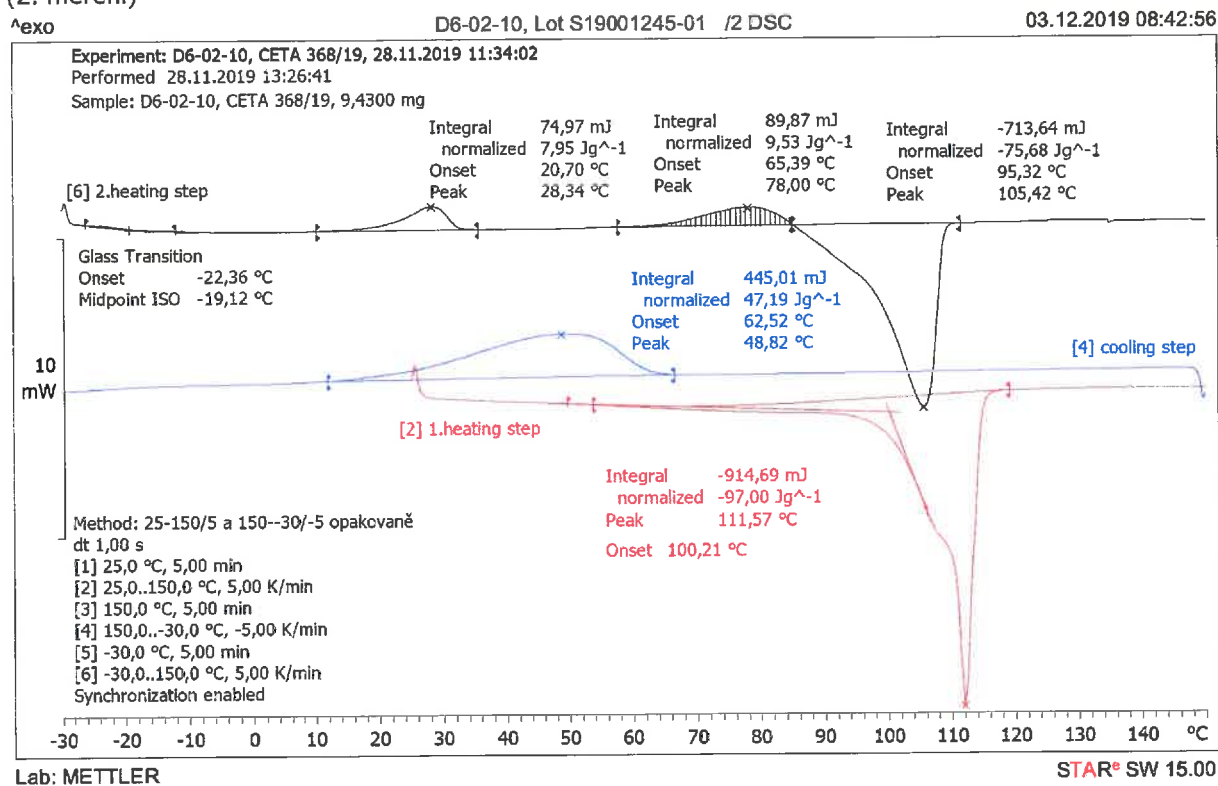

Obrázek č. 3: DSC vzorku D6-02-10, Lot S19001245-01, CETA č. 368/19 (16 týdnů degradovaný) (3. měření)

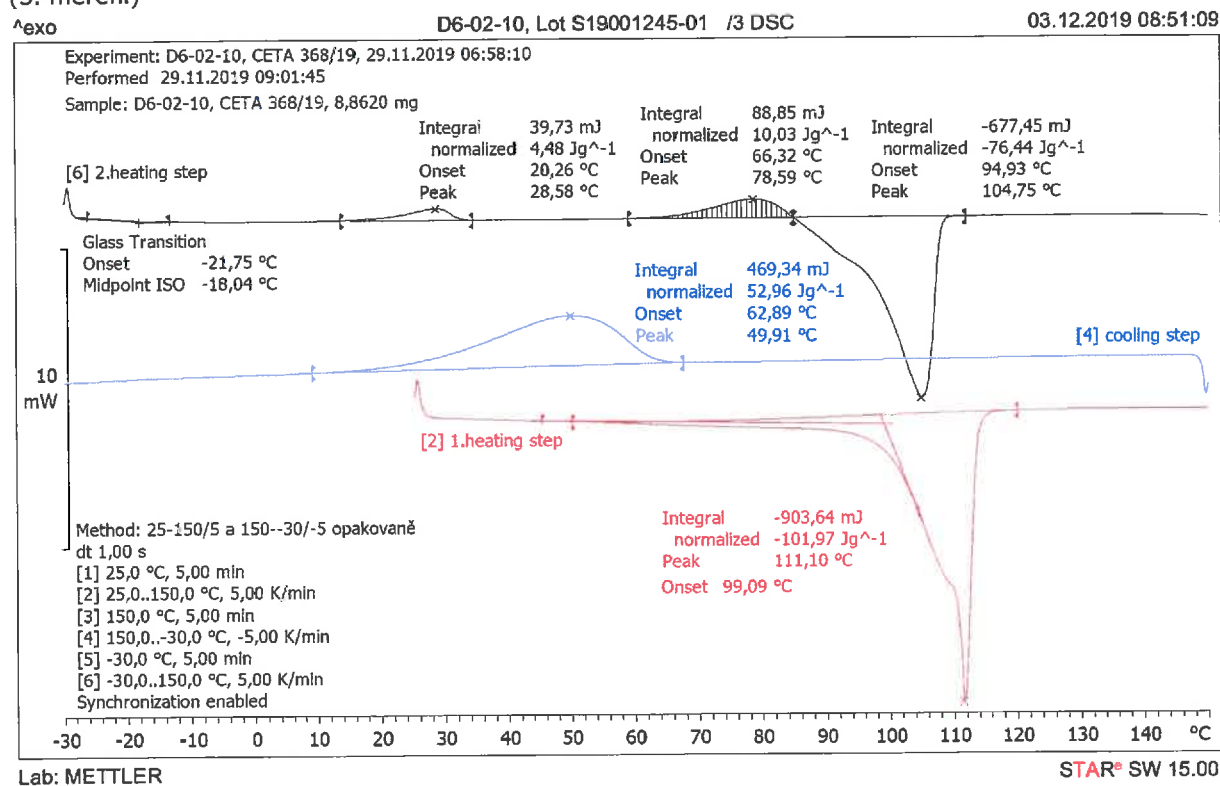

### Termogravimetrická analýza

Na obrázcích č. 4 a 5 jsou zobrazena měření TGA u vzorku D6-02-10, Lot S19001245-01, CETA č. 368/19 (16 týdnů degradovaný). Na hmotnostní křivce (černá křivka) nebyl zaznamenán žádný hmotnostní úbytek od 25 °C do 150 °C. Od cca 150 °C začíná termický rozklad polymeru. Na křivce tepelného toku (modrá křivka) byl zaznamenán endotermický pík charakterizovaný teplotou píku 110,99 (1. měření) a 111,07 °C (2. měření), odpovídající tání polymeru. Druhý endotermický pík odpovídá termickému rozkladu polymeru a je charakterizovaný onset teplotou 212,11 °C (1. měření) a 213,43 °C (2. měření).

Obrázek č. 4: TGA vzorku D6-02-10, Lot S19001245-01, CETA č. 368/19 (16 týdnů degradovaný) (1. měření)

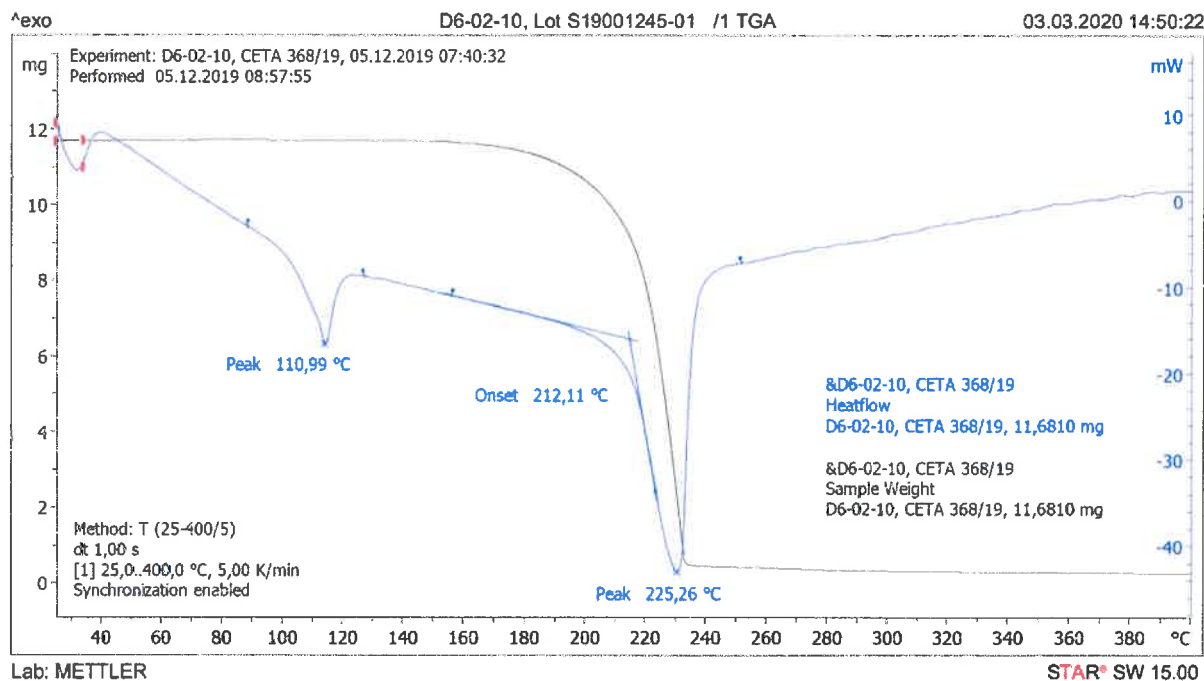

Obrázek č. 5: TGA vzorku D6-02-10, Lot S19001245-01, CETA č. 368/19 (16 týdnů degradovaný) (2. měření)

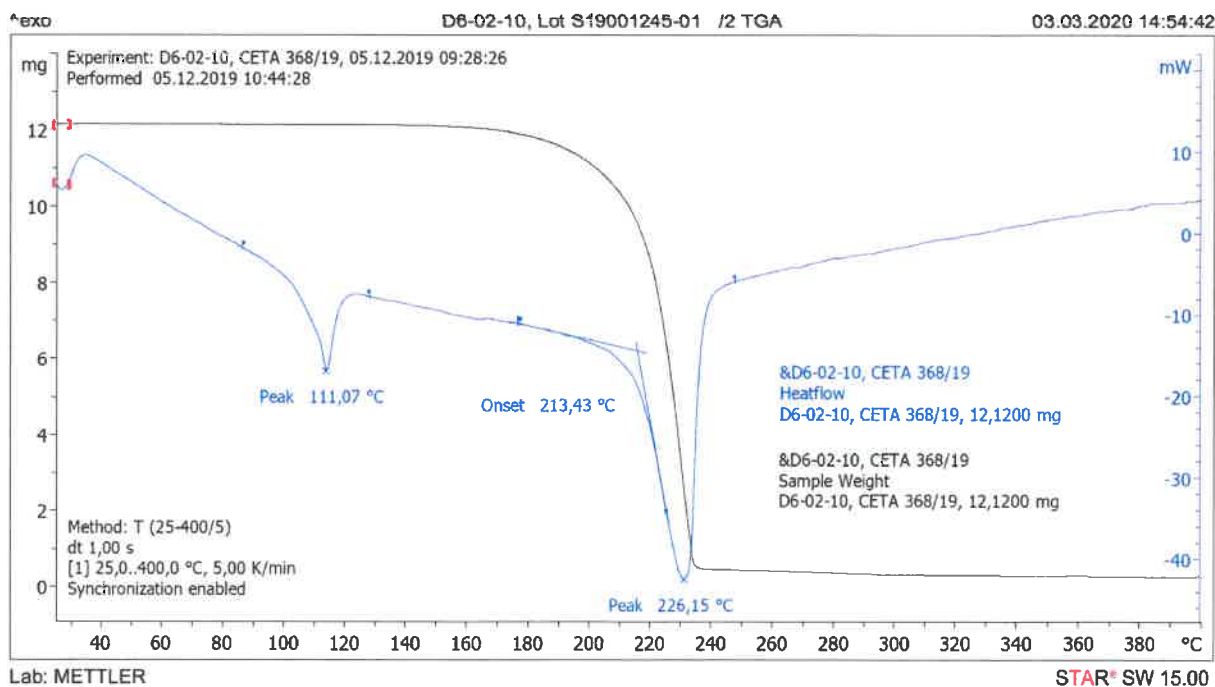

**Č. 20-0324-61**

|                 |                                                               |               |            |
|-----------------|---------------------------------------------------------------|---------------|------------|
| Název:          | <b>Termická analýza biodegradabilního polymeru</b>            |               |            |
| Přijetí vzorku: | 24. 1. 2020                                                   |               |            |
| Vypracoval:     | T. Čermák                                                     | Zkontroloval: | J. Vaněček |
| Zadavatel:      | ELLA-CS s.r.o., Milady Horákové 504/45, 500 06 Hradec Králové |               |            |

**Výsledky:**

Byla provedena termická analýza biodegradabilního polymeru:

D6-02-13, Lot S19001245-01, CETA č. 21/20 (24 týdnů degradovaný)

Výsledky diferenciální skenovací kalorimetrie (DSC) jsou uvedeny v tabulce č. 1 (teploty tání a krystalizace, entalpie tání a studené krystalizace) a v tabulce č. 2 (krystalinita).

Měření DSC jsou zobrazena na obrázcích č. 1 – 3.

Měření termogravimetrické analýzy (TGA) jsou zobrazena na obrázcích č. 4 a 5.

**Poznámky:**

Analýza byla provedena v souladu s normami:

- ČSN EN ISO 11357-1 Plasty – Diferenciální snímací kalorimetrie (DSC) – Část 1: Základní principy
- ČSN EN ISO 11357-2 Plasty - Diferenciální snímací kalorimetrie (DSC) – Část 2: Stanovení teploty a výšky skoku skelného přechodu
- ČSN EN ISO 11357-3 Plasty - Diferenciální snímací kalorimetrie (DSC) – Část 3: Stanovení teploty a entalpie tání a krystalizace
- ČSN EN ISO 11358-1 Plasty – Termogravimetrie (TG) polymerů – Část 1: Obecné principy

**Ing. Michal Bartoš**

Vedoucí úseku ANALYTIKA

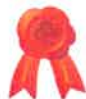

Digitálně podepsáno  
Jméno: Ing. Michal Bartoš  
Datum: 14.04.2020 09:38:15

**Analyzovaný vzorek:**

Název: D6-02-13, Lot S19001245-01, CETA č. 21/20 (24 týdnů degradovaný)

Materiál: Polydioxanon (PDO).

Skládování: Exsikátor, laboratorní teplota

**Diferenční skenovací kalorimetrie****Přístrojové vybavení:**DSC823<sup>e</sup> Mettler Toledo

- Měřicí teplotní rozsah: 203 – 973 K (-70 to 700 °C)
- Rozlišení: přibližně 0.07 µW
- Měřicí kelímek: hliníkový kelímek (100µl), zalisovaný víčkem s otvorem vytvořeným speciálním bodlem
- Referenční kelímek: prázdný hliníkový kelímek (100µl), zalisovaný víčkem s otvorem vytvořeným speciálním bodlem

S ohledem na požadavky hodnocení krystalinity byly vzorky navažovány na mikrováhách (součást zařízení TGA/DSC1 Mettler Toledo).

**Metoda:**

| Krok |                           | Teplotní rozsah [°C] | Čas isotermy [min]/<br>teplotní gradient [°C/min] |
|------|---------------------------|----------------------|---------------------------------------------------|
| 1.   | isotermický krok          | 25                   | 5 min                                             |
| 2.   | dynamický krok – 1.ohřev  | 25 – 150             | 5 °C/min                                          |
| 3.   | isotermický krok          | 150                  | 5 min                                             |
| 4.   | dynamický krok – chlazení | 150 – -40            | 5 °C/min                                          |
| 5.   | isotermický krok          | -40                  | 5 min                                             |
| 6.   | dynamický krok – 2.ohřev  | -40 – 150            | 5 °C/min                                          |

**Termogravimetrická analýza****Přístrojové vybavení:**

TGA/DSC1 Mettler Toledo

- Teplotní rozsah: 298 – 1373 K (25 – 1100 °C)
- Citlivost: 0.5 mW
- Teplotní rozlišení: 0.005 K
- Měřicí kelímek: hliníkový kelímek (100µl), zalisovaný víčkem s otvorem vytvořeným speciálním bodlem

**Metoda:**

| Krok |                | Teplotní rozsah [°C] | Teplotní gradient [°C/min] |
|------|----------------|----------------------|----------------------------|
| 1.   | dynamický krok | 25 – 400             | 5                          |

Průtok inertního plynu (dusík) byl nastaven na cca 80 ml/min.

### Hodnocení a závěr:

#### Diferenční skenovací kalorimetrie

Tabulka č. 1: Termická charakterizace vzorku D6-02-13, Lot S19001245-01, CETA č. 21/20 (24 týdnů degradovaný)

| Stanovení<br>č. | Teplota tání                   |                |                | Entalpie<br>tání<br>[J/g] | Teplota krystalizace           |              | Skelný<br>přechod | Entalpie<br>studené<br>krystalizace | Entalpie<br>studené<br>krystalizace<br>(premelting) | Entalpie<br>tání |  |
|-----------------|--------------------------------|----------------|----------------|---------------------------|--------------------------------|--------------|-------------------|-------------------------------------|-----------------------------------------------------|------------------|--|
|                 | T <sub>m</sub> (onset)<br>[°C] | Peak 1<br>[°C] | Peak 2<br>[°C] |                           | T <sub>c</sub> (onset)<br>[°C] | Peak<br>[°C] |                   |                                     |                                                     |                  |  |
|                 |                                |                |                |                           |                                |              |                   |                                     |                                                     |                  |  |
|                 |                                |                |                |                           |                                |              |                   |                                     |                                                     |                  |  |
|                 | 1.ohřev                        |                |                | 1.ohřev                   |                                | chlazení     |                   | 2.ohřev                             |                                                     | 2.ohřev          |  |
| 1               | 99,98                          | -              | 111,95         | 77,55                     | 58,35                          | 45,30        | -                 | -                                   | 9,15                                                | 63,73            |  |
| 2               | 99,87                          | -              | 111,11         | 86,99                     | 58,18                          | 45,57        | -                 | -                                   | 9,25                                                | 65,91            |  |
| 3               | 98,91                          | -              | 110,99         | 86,16                     | 58,43                          | 45,73        | -                 | -                                   | 8,99                                                | 67,45            |  |
| Průměr          | 99,6                           | -              | 111,4          | 83,6                      | 58,3                           | 45,5         | -                 | -                                   | 9,1                                                 | 65,7             |  |
| SD              | 0,6                            | -              | 0,5            | 5,2                       | 0,1                            | 0,2          | -                 | -                                   | 0,1                                                 | 1,9              |  |

Onset teplota ..... extrapolovaná počáteční teplota (průsečík extrapolované základní čáry tepelného toku s tečnou v inflexním bodu píku)

### Výpočty:

$$X_c = \frac{\Delta H_f - \Delta H_c}{\Delta H_f 100\%} \times 100$$

X<sub>c</sub>.....Krystalinita; procentuální podíl krystalické fáze polymeru [%]

ΔH<sub>f</sub>.....Entalpie tání; teplo pohlcené v průběhu tání vzorku [J/g]

ΔH<sub>c</sub>.....Entalpie studené krystalizace; teplo uvolněné v průběhu studené krystalizace vzorku [J/g]

ΔH<sub>f</sub> 100% .....Teoretická hodnota entalpie tání 100% krystalického polymeru PDO [J/g]; 141,18 J/g (zdroj: Thermal properties and non-isothermal crystallization behavior of biodegradable poly(p-dioxanone)/poly(vinyl alcohol) blends; DOI: 10.1002/pi.1904)

Krystalinita polymeru (X<sub>c</sub>) vyhodnocená během 1. ohřevu charakterizuje polymer ("as received") s jeho teplotní a mechanickou historií (vliv výrobního postupu, skladování atd.). Krystalinita vyhodnocená během 2. ohřevu charakterizuje polymer po vymazání jeho teplotní i mechanické historie a slouží především ke srovnávání polymerních materiálů vzájemně.

Tabulka č. 2: Krystalinita vzorku D6-02-13, Lot S19001245-01, CETA č. 21/20 (24 týdnů degradovaný) vyhodnocená během 1. a 2. ohřevu

| Stanovení č.  | Krystalinita, $X_c$<br>[%] |             |
|---------------|----------------------------|-------------|
|               | 1. ohřev                   | 2. ohřev    |
| 1             | 54,93                      | 38,66       |
| 2             | 61,62                      | 40,13       |
| 3             | 61,03                      | 41,41       |
| <b>Průměr</b> | <b>59,2</b>                | <b>40,1</b> |
| SD            | 3,7                        | 1,4         |

Obrázek č. 1: DSC vzorku D6-02-13, Lot S19001245-01, CETA č. 21/20 (24 týdnů degradovaný) (1. měření)

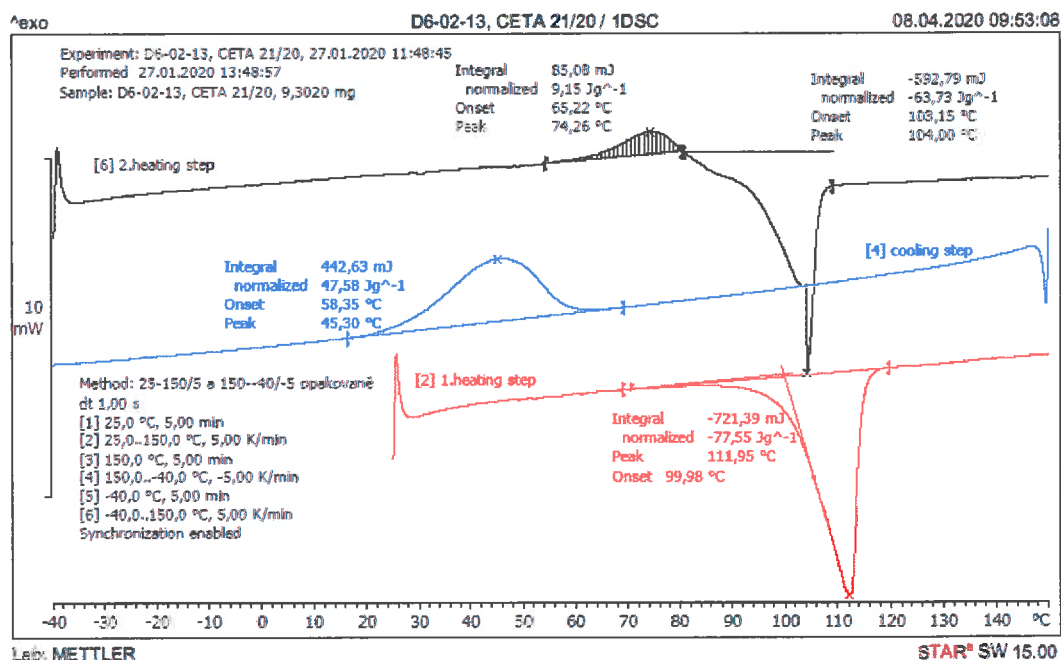

Obrázek č. 2: DSC vzorku D6-02-13, Lot S19001245-01, CETA č. 21/20 (24 týdnů degradovaný) (2. měření)

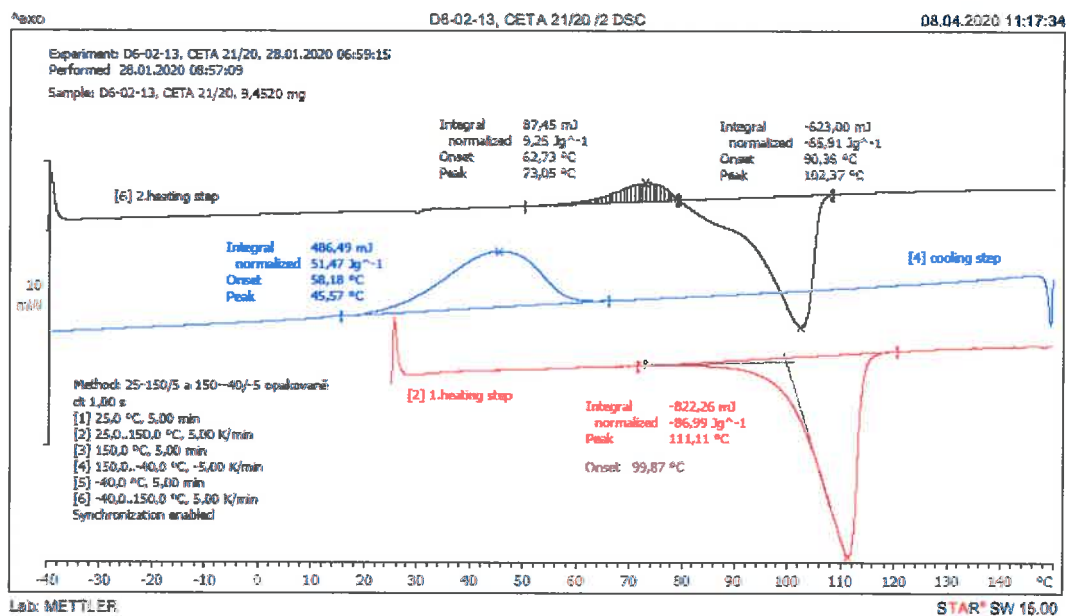

Obrázek č. 3: DSC vzorku D6-02-13, Lot S19001245-01, CETA č. 21/20 (24 týdnů degradovaný) (3. měření)

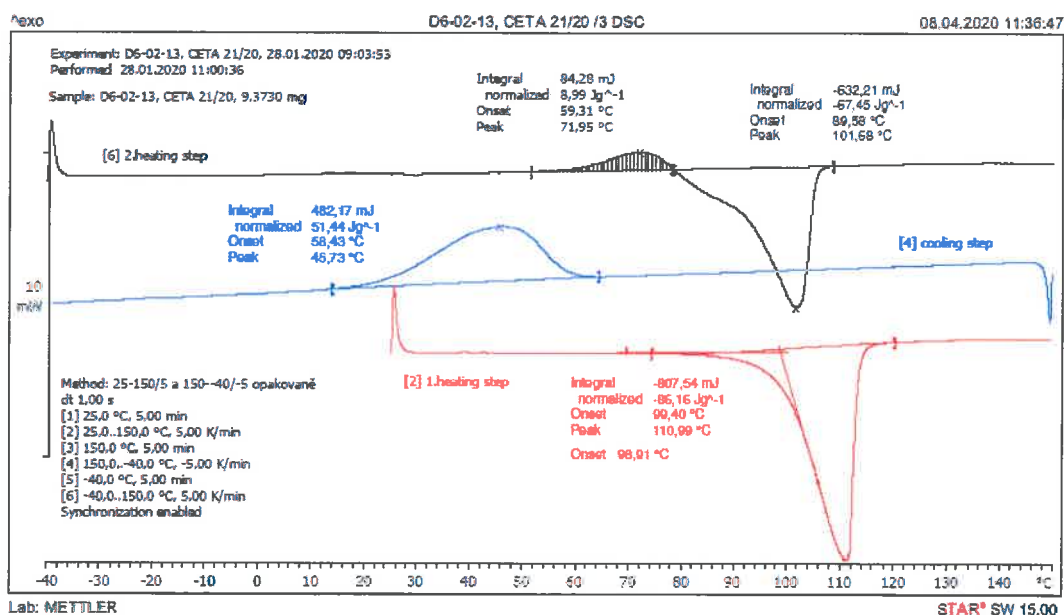

Termogravimetrická analýza

Na obrázcích č. 4 a 5 jsou zobrazena měření TGA u vzorku D6-02-13, Lot S19001245-01, CETA č. 21/20 (24 týdnů degradovaný). Na hmotnostní křivce (černá křivka) nebyl zaznamenán žádný hmotnostní úbytek od 25 °C do 150 °C. Od cca 150 °C začíná termický rozklad polymeru. Na křivce tepelného toku (modrá křivka) byl zaznamenán endotermický pík charakterizovaný teplotou píku 110,13 °C (1. měření) a 110,64 °C (2. měření), odpovídající tání polymeru. Druhý endotermický pík odpovídá termickému rozkladu polymeru a je charakterizovaný onset teplotou 220,03 °C (1. měření) a 220,34 °C (2. měření).

Obrázek č. 4: TGA vzorku D6-02-13, Lot S19001245-01, CETA č. 21/20 (24 týdnů degradovaný) (1. měření)

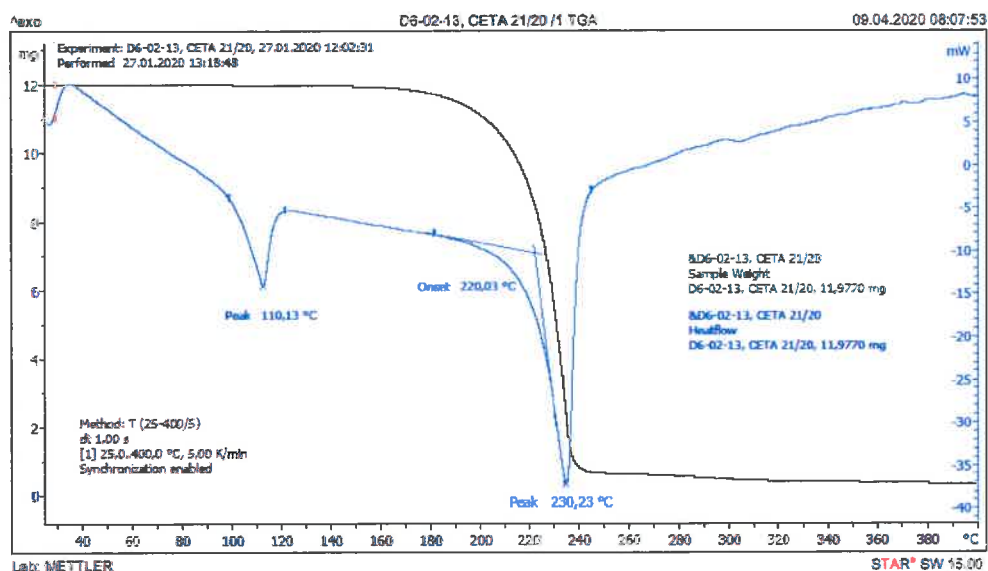

Obrázek č. 5: TGA vzorku D6-02-13, Lot S19001245-01, CETA č. 21/20 (24 týdnů degradovaný) (2. měření)

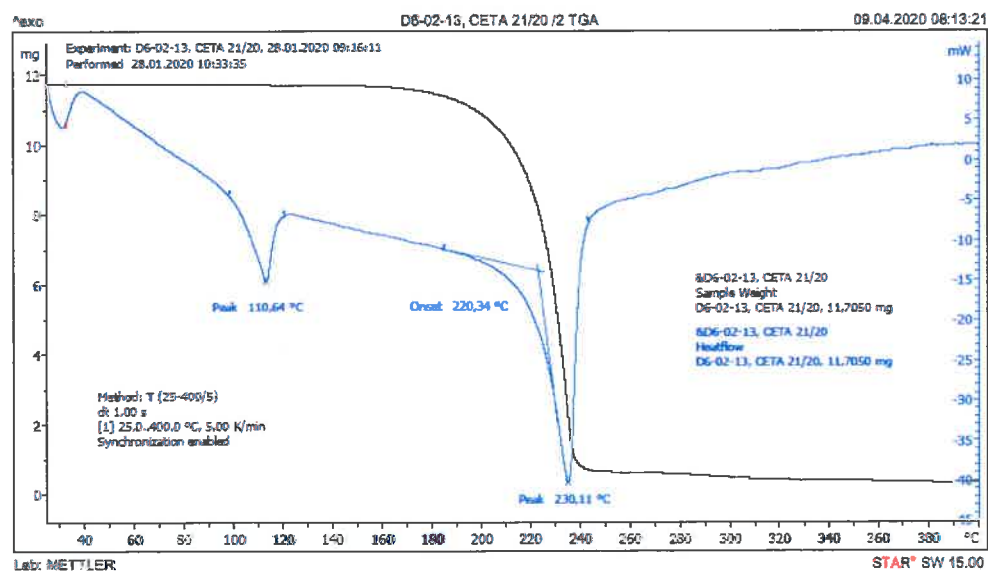

Supplement: s1 [file s1]
